# Supplementary material for: Targeting macrophage priming by polyphyllin VII triggers anti-tumor immunity via STING-governed cytotoxic T-cell infiltration in lung cancer
Source: PubMed Central journal article supplement (PMC7721813; doi:10.1038/s41598-020-77800-w), 2020-12-07

Targeting macrophage priming by Polyphyllin VII triggers anti-tumor immunity via STING-governed cytotoxic T-cell infiltration in lung cancer

Jinglu Yu <sup>a, b</sup>, Haibin Deng <sup>a, b, \*</sup> and Zhenye Xu <sup>a, b, \*</sup>

<sup>a</sup> Department of oncology, Shanghai University of Traditional Chinese Medicine Longhua Hospital, Shanghai 200032, China

<sup>b</sup> Shanghai University of Traditional Chinese Medicine, Shanghai 200030, China

\* correspondence should be addressed to H. D. ([HaibinDeng@126.com](mailto:HaibinDeng@126.com)) ; Z. X. ([Zhenye\\_Xu@126.com](mailto:Zhenye_Xu@126.com))



Supplementary material1\_primers sequences

| Gene            | Sense                    | Antisense               |
|-----------------|--------------------------|-------------------------|
| mmGapdh         | CATCACTGCCACCCAGAAGACTG  | ATGCCAGTGAGCTTCCCGTTCAG |
| mmIrfb1         | GCCTTTGCCATCCAAGAGATGC   | ACACTGTCTGCTGGTGGAGTTC  |
| mmCcl5          | CTGCTGCTTTGCCTACCTCT     | TCCTTCGAGTGACAAACACG    |
| mmCxcl9         | CGAGGCACGATCCACTACAA     | AGGCAGGTTTGATCTCCGTT    |
| mmCxcl10        | AGTGCTGCCGTCATTTTCTG     | TCCCTATGGCCCTCATTCTCA   |
| mmCiita         | ACCTTCGTCAGACTGGCGTTGA   | GCCATTGTATCACTCAAGGAGGC |
| mmCd86          | ACGTATTGGAAGGAGATTACAGCT | TCTGTCAGCGTTACTATCCCGC  |
| mmCd40          | ACCAGCAAGGATTGCGAGGCAT   | GGATGACAGACGGTATCAGTGG  |
| mmPd1           | TGCGGACTACAAGCGAATCACG   | CTCAGCTTCTGGATAACCCTCG  |
| mmiNOS          | GAGACAGGGAAGTCTGAAGCAC   | CCAGCAGTAGTTGCTCCTCTTC  |
| mmTnfa          | GGTGCCTATGTCTCAGCCTCTT   | GCCATAGAAGTATGAGAGGGAG  |
| mmIrf3          | CGGAAAGAAGTGTGCGGTTAGC   | CAGGCTGCTTTTGCCATTGGTG  |
| mmIrf7          | CCTCTGCTTTCTAGTGATGCCG   | CGTAAACACGGTCTTGCTCCTG  |
| mmIrf1          | TCCAAGTCCAGCCGAGACACTA   | ACTGCTGTGGTCATCAGGTAGG  |
| mmIrf5          | CCTACAGAACCACTCTTGCCCTG  | CCTTGTGGGTTGCTGATGGTGA  |
| mmIi-10         | CGGGAAGACAATAACTGCACCC   | CGGTTAGCAGTATGTTGTCCAGC |
| mmTgfb1         | TGATACGCCTGAGTGGCTGTCT   | CACAAGAGCAGTGAGCGCTGAA  |
| hsGAPDH         | GAGTCAACGGATTTGGTCGT     | TTGATTTTGGAGGGATCTCG    |
| hsIFN $\beta$ 1 | AGGACAGGATGAACTTTGAC     | TGATAGACATTAGCCAGGAG    |

|                 |                          |                         |
|-----------------|--------------------------|-------------------------|
| hsCXCL10        | GGTGAGAAGAGATGTCTGAATCC  | GTCCATCCTTGGAAGCACTGCA  |
| hsCIITA         | CTACTTCAGGCAGCAGAGGAGA   | GCTGTGTCTTCCGAGGAACTTC  |
| hsCD86          | CCATCAGCTTGTCTGTTTCATTCC | GCTGTAATCCAAGGAATGTGGTC |
| hsPDL1          | TGCCGACTACAAGCGAATTACTG  | CTGCTTGTCCAGATGACTTCGG  |
| hsIL-10         | TCTCCGAGATGCCTTCAGCAGA   | TCAGACAAGGCTTGGCAACCCA  |
| hsTGF $\beta$ 1 | TACCTGAACCCGTGTTGCTCTC   | GTTGCTGAGGTATCGCCAGGAA  |

Supplementary material2\_full length gels and blots

Fig1.e

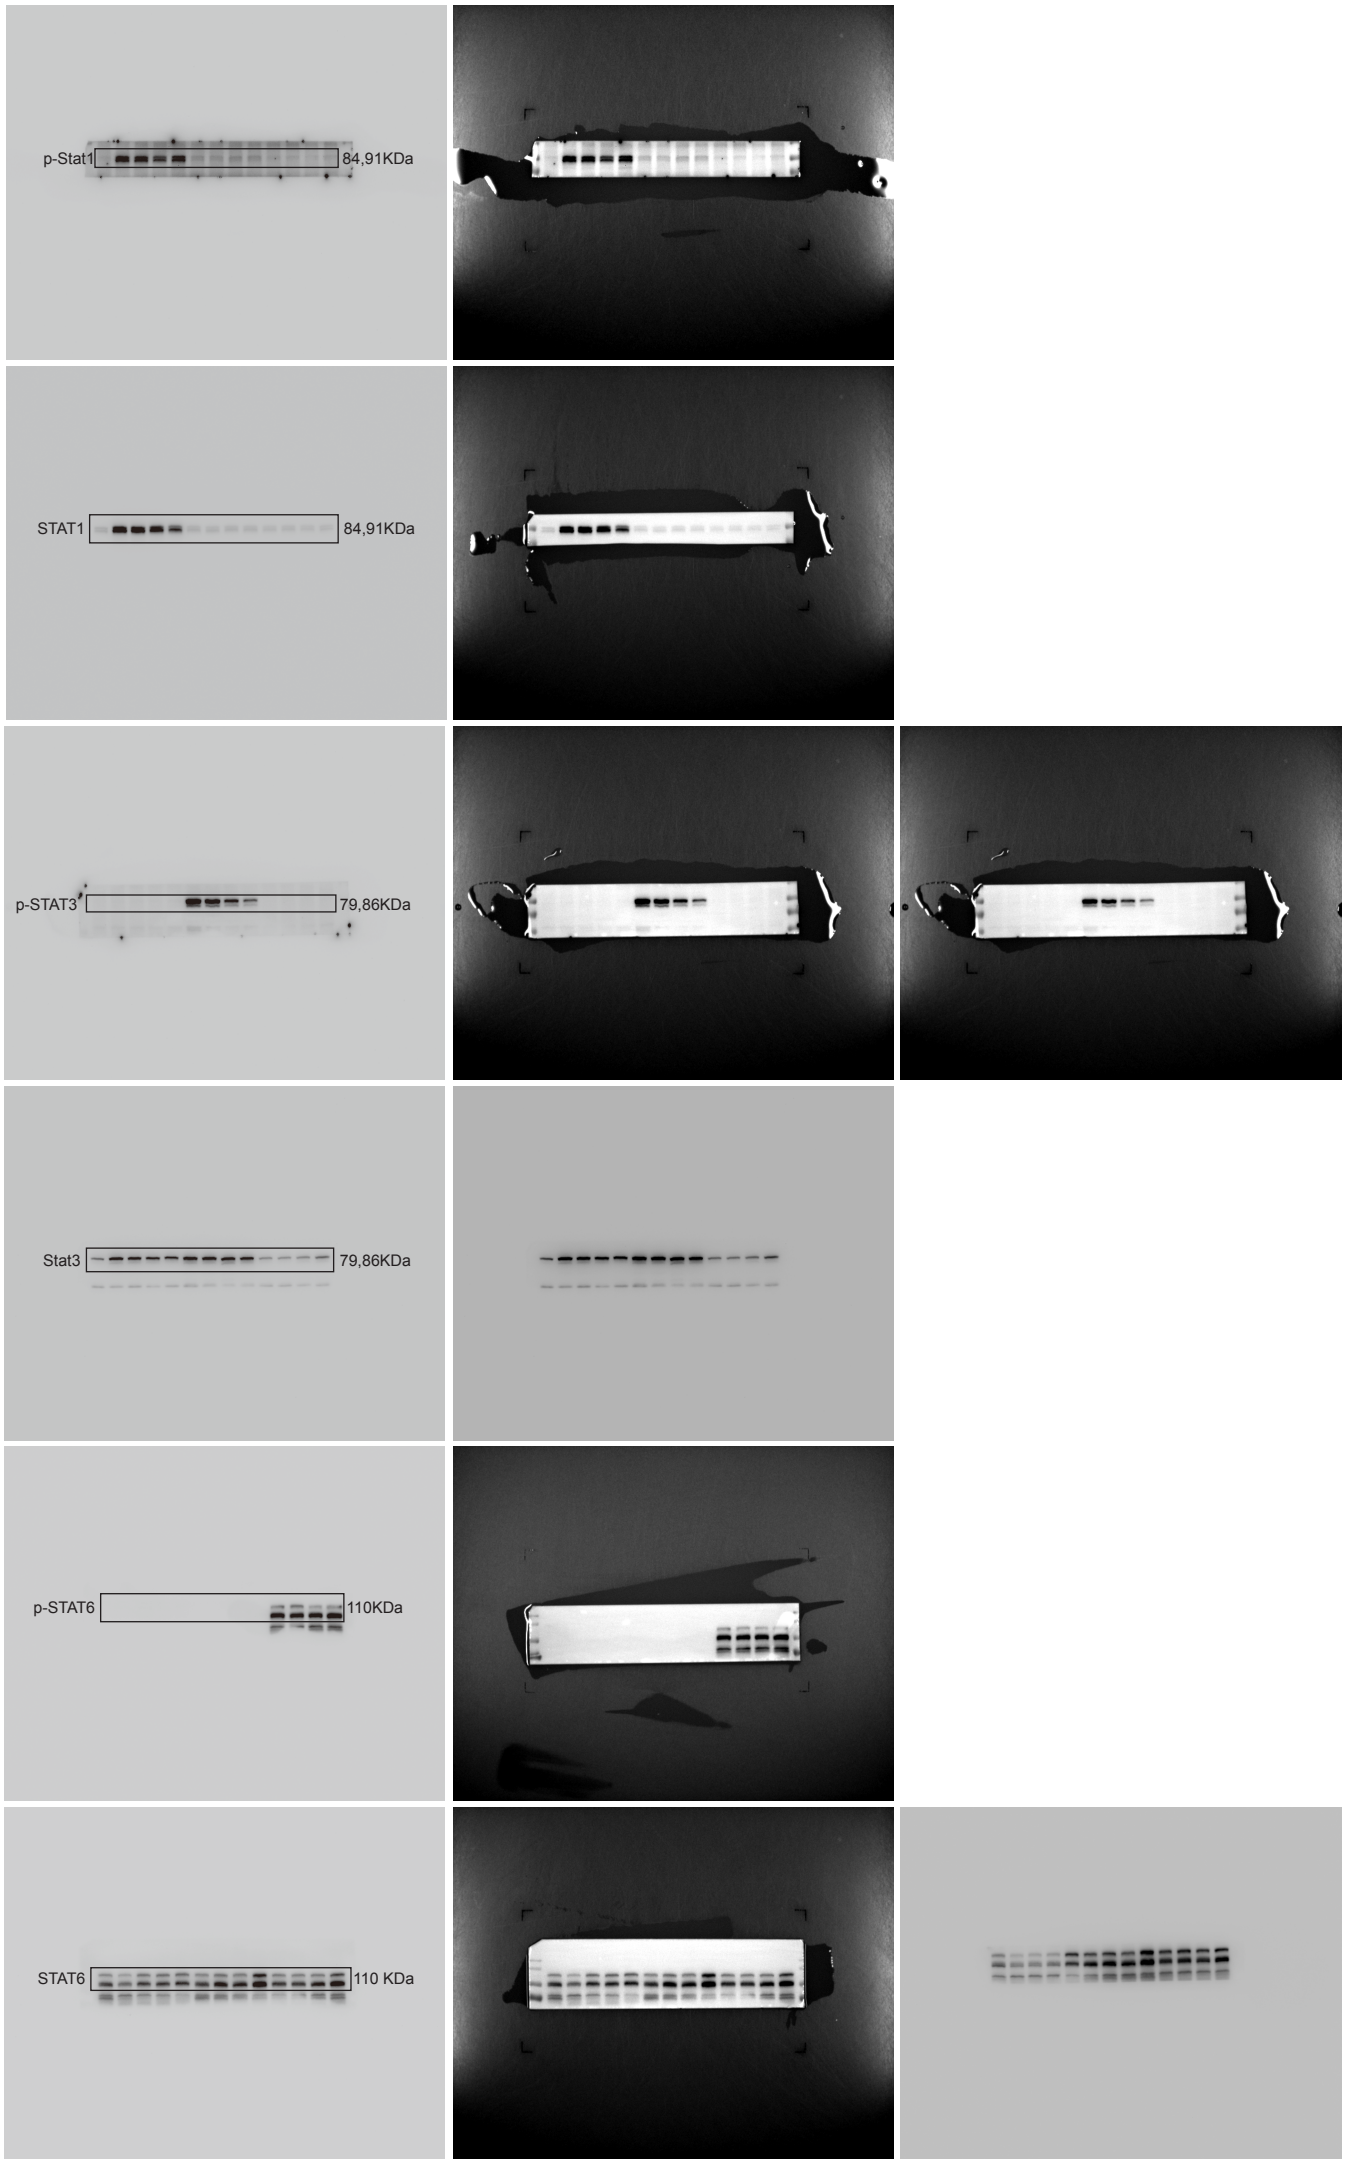

cGAS 62KDa

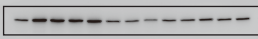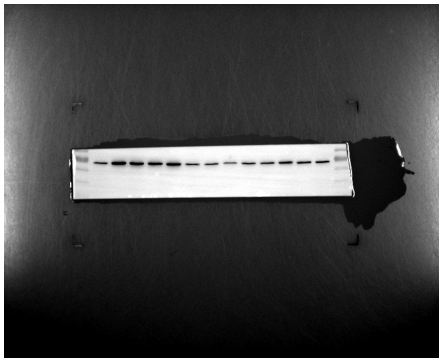

STING long exposure 33.35KDa

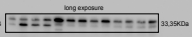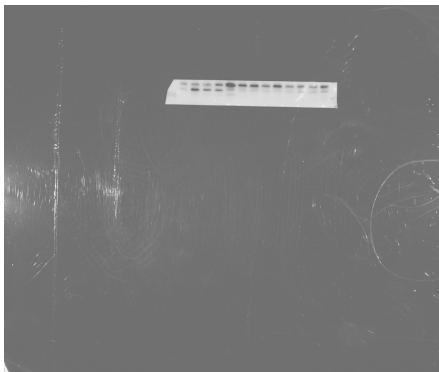

p-TBK1 84KDa

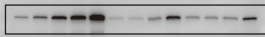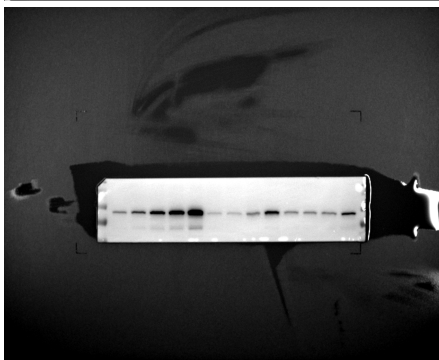

TBK1 84KDa

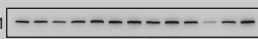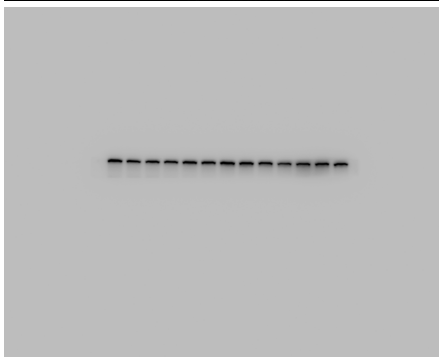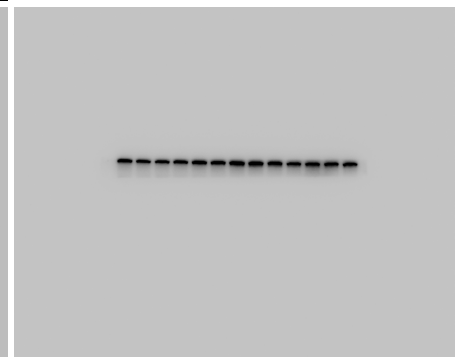

iNOS 131KDa

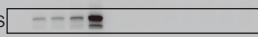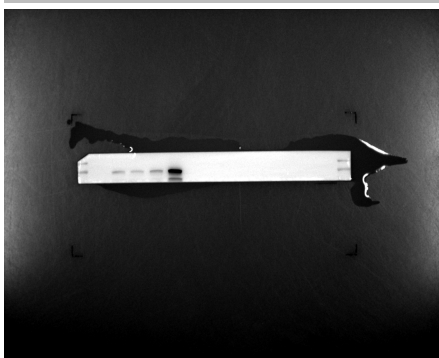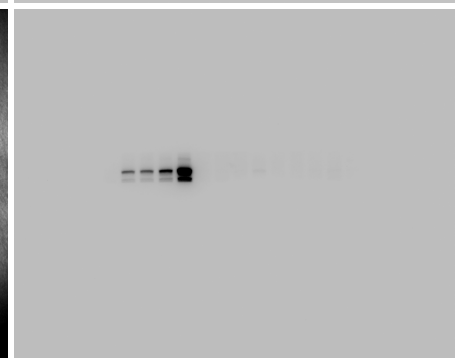

PD-L1 40-60KDa

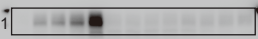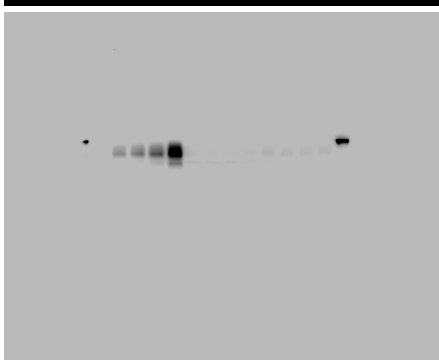

CD206 166KDa

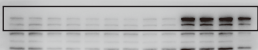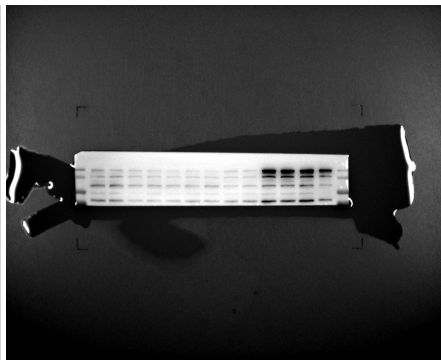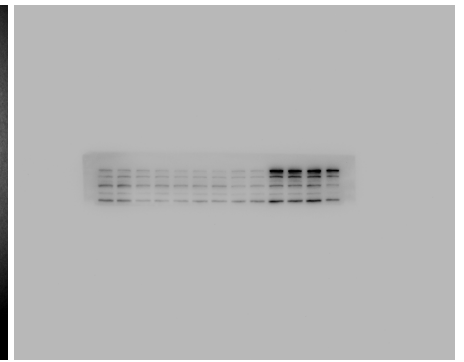

Tubulin 55KDa

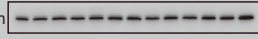

Fig1.f

iNOS 131KDa

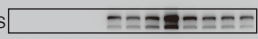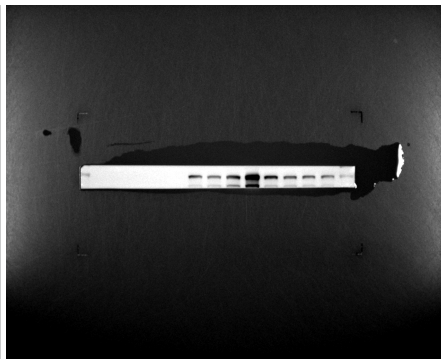

p-TBK1 84KDa

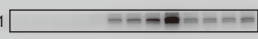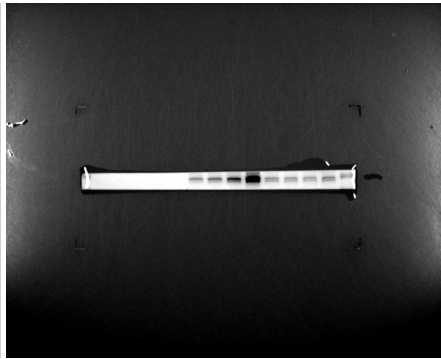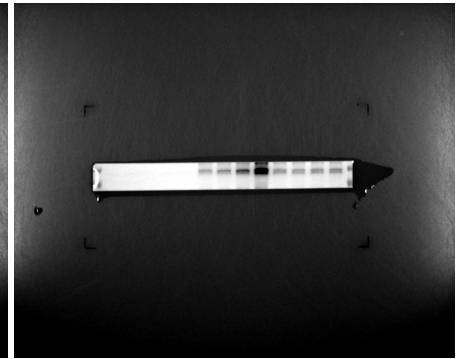

TBK1 84KDa

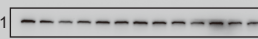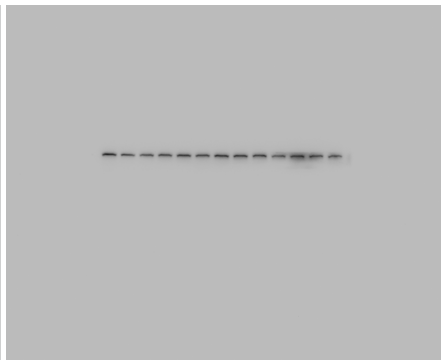

p-STAT1 84,91KDa

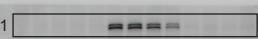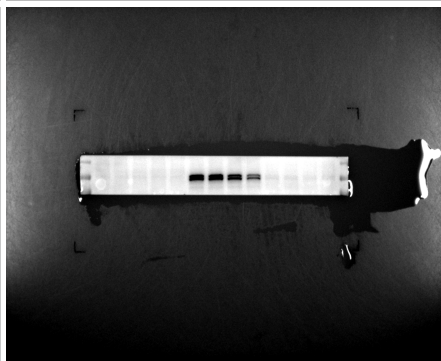

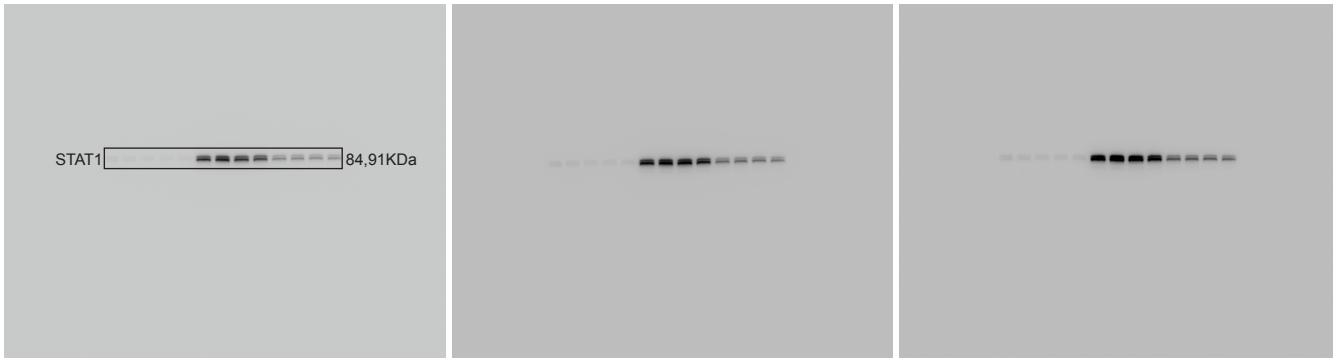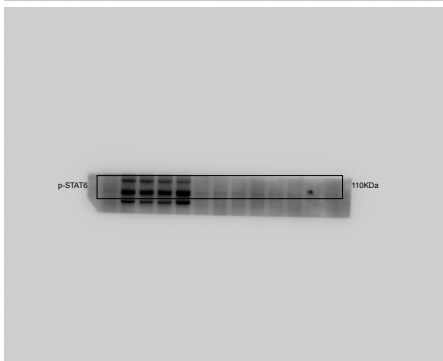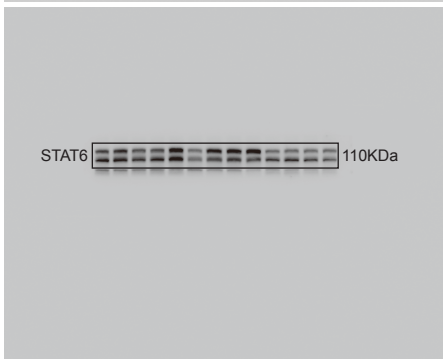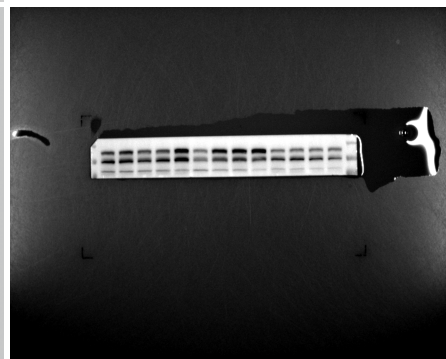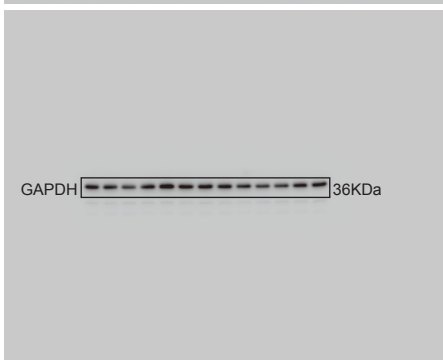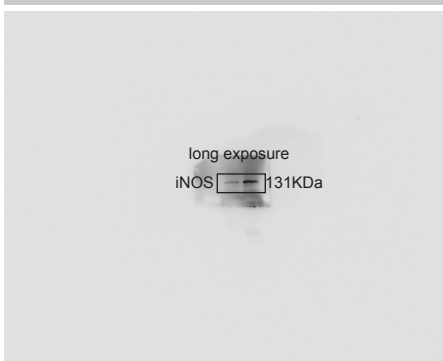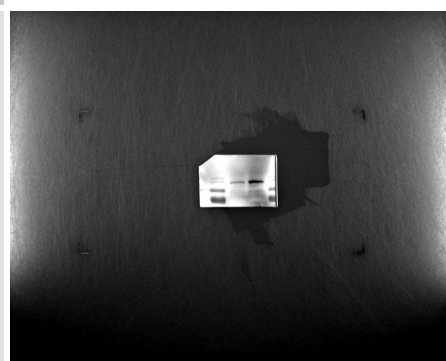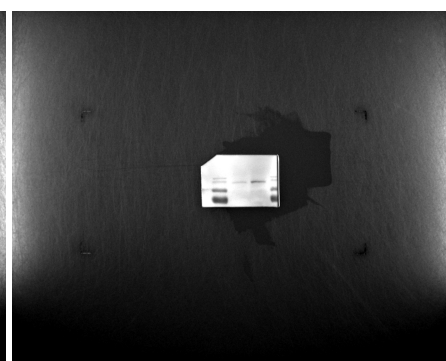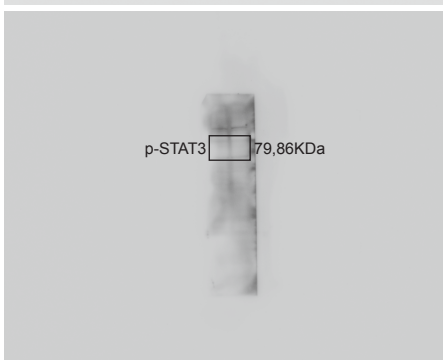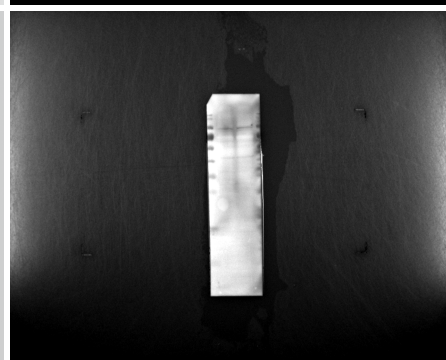

Fig1.g



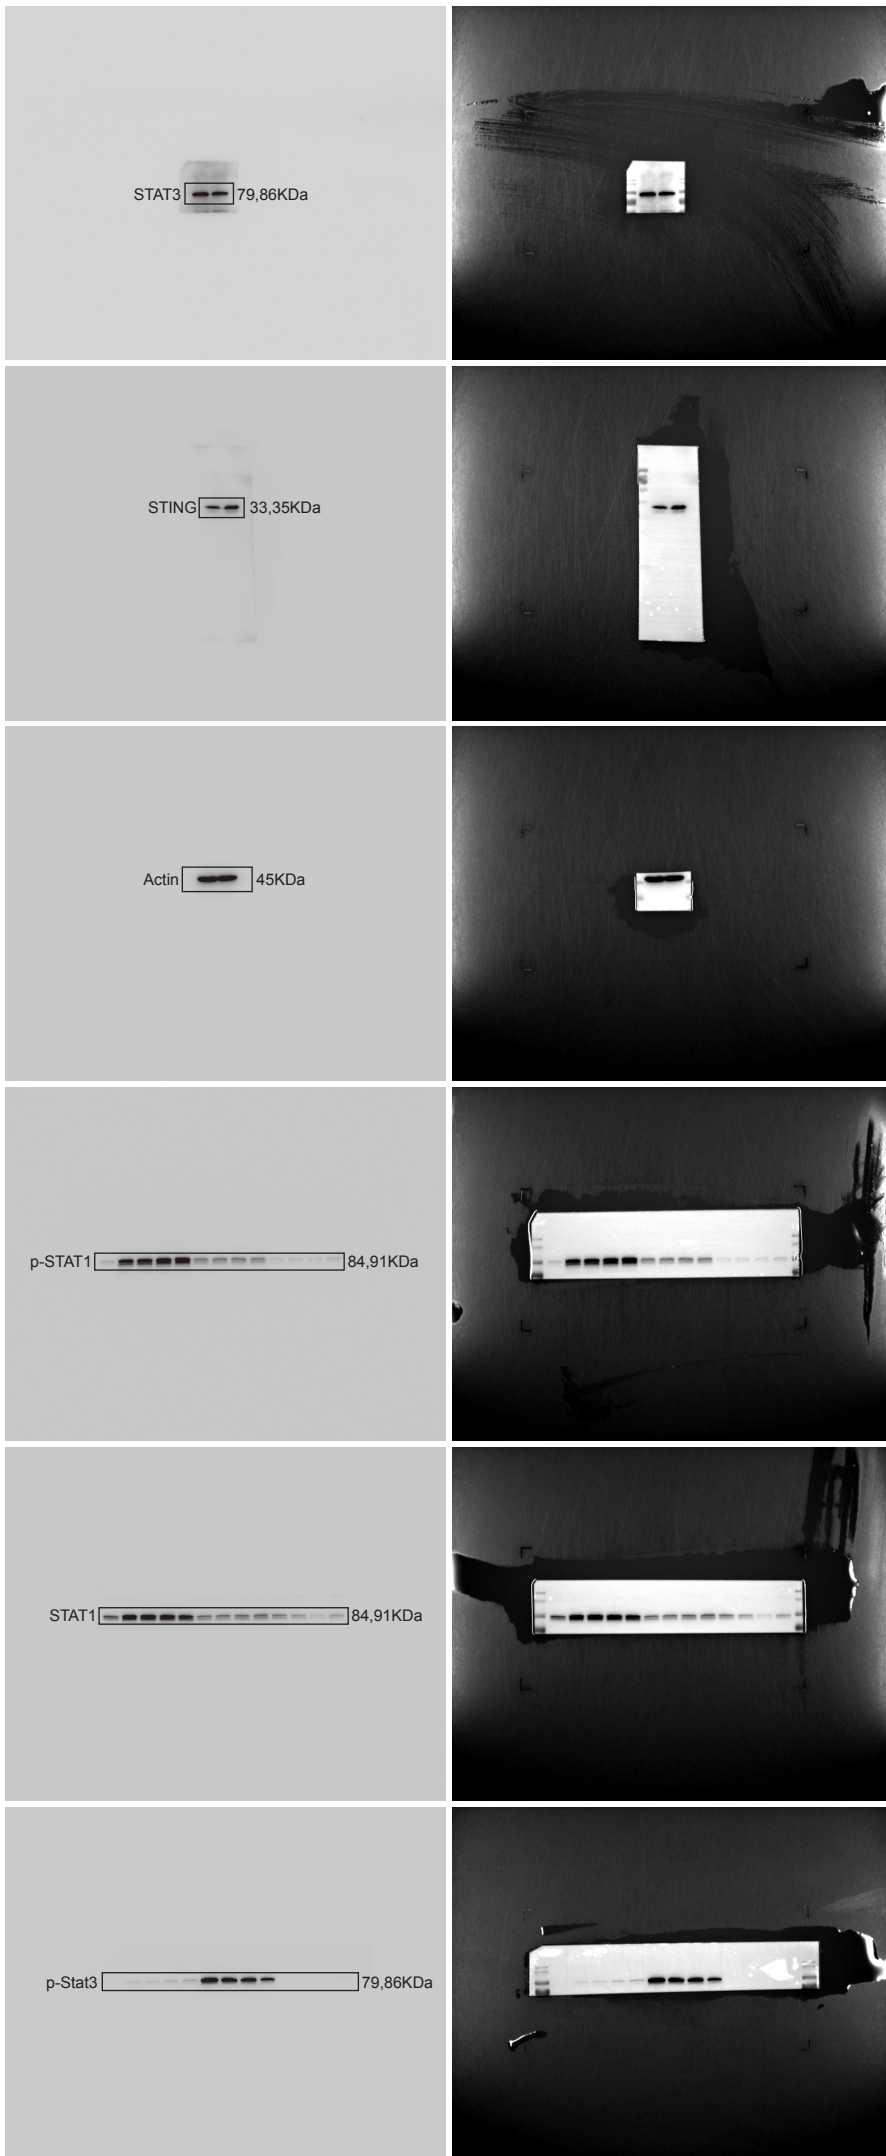

Fig1.h

Stat3 79,86KDa

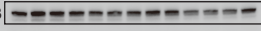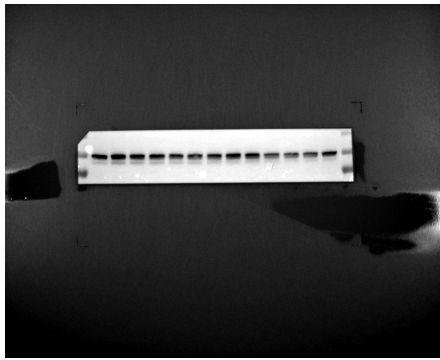

p-STAT6 110KDa

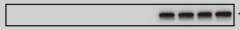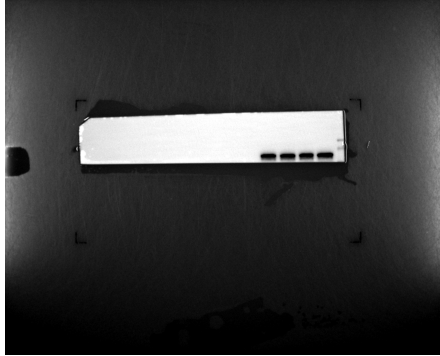

STAT6 110KDa

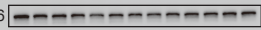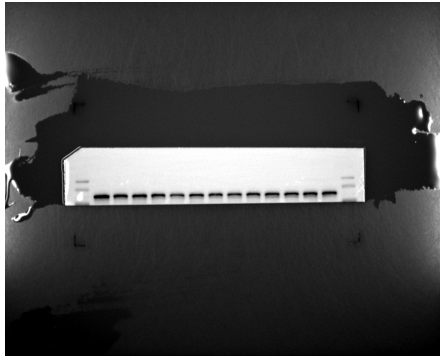

cGAS 62KDa

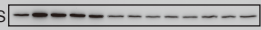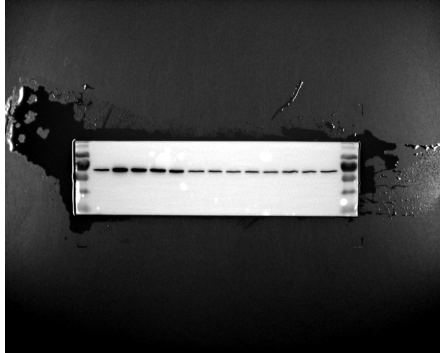

p-STING 40KDa

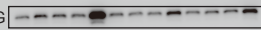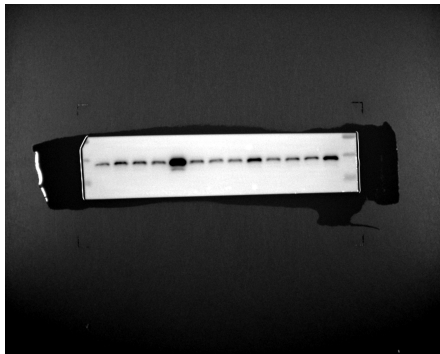

STING 33,35KDa

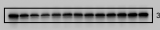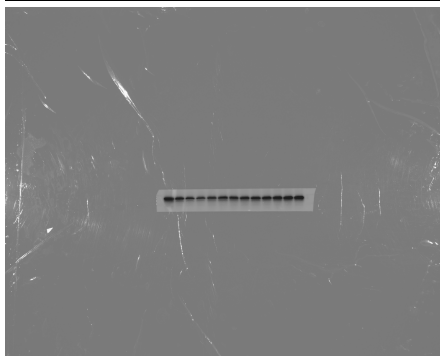



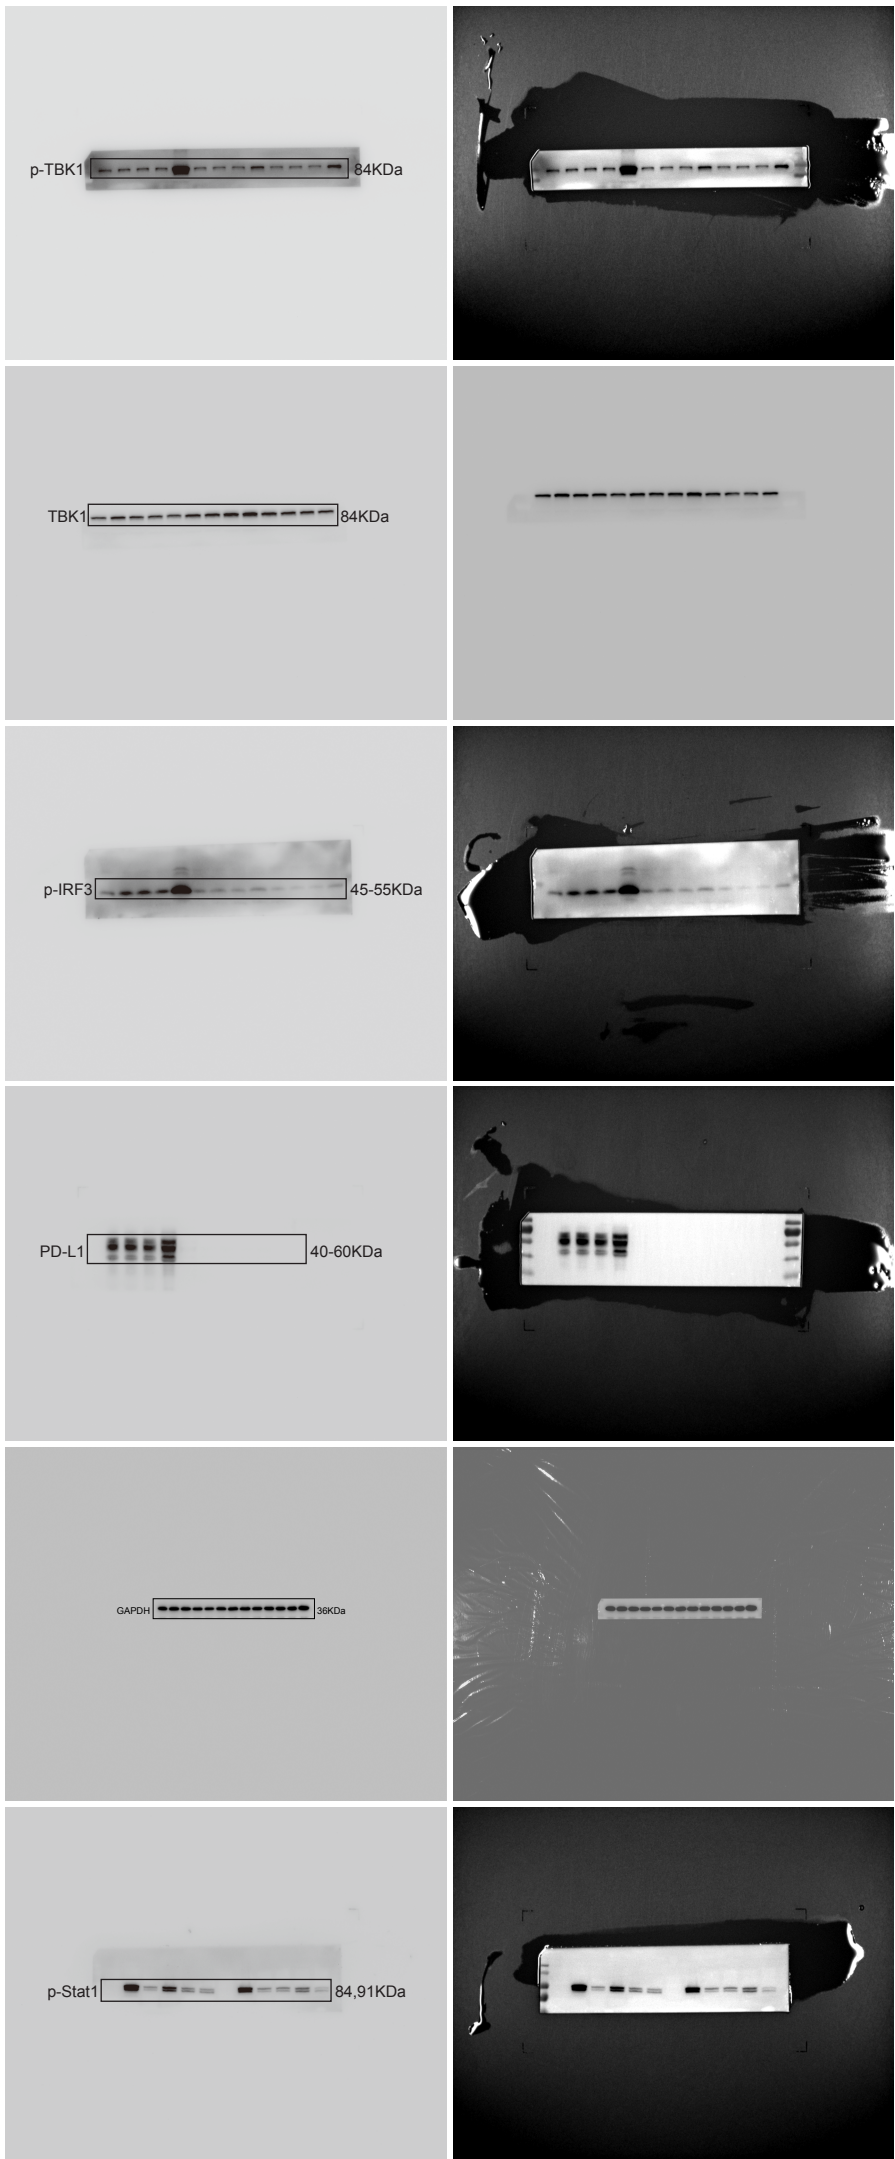

Fig2.a

STAT1 84,91KDa

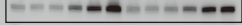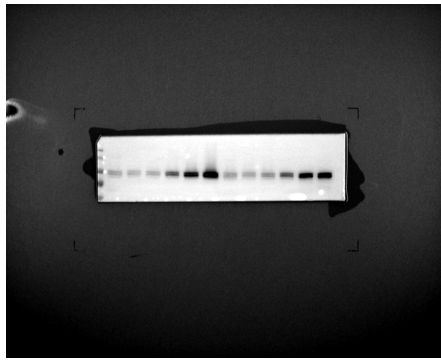

STING 33,35KDa

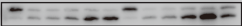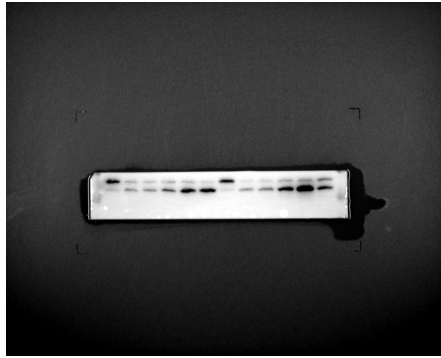

p-TBK1 84KDa

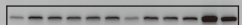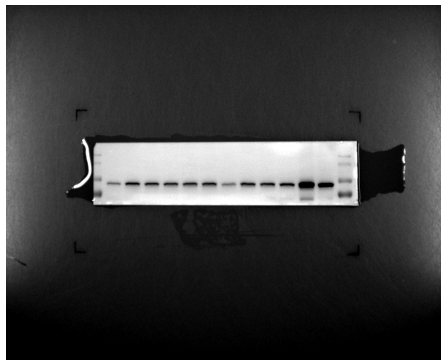

TBK1 84KDa

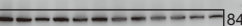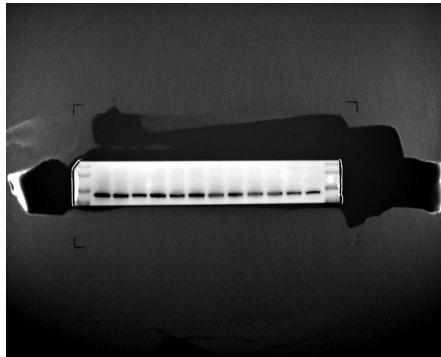

iNOS 131KDa

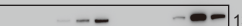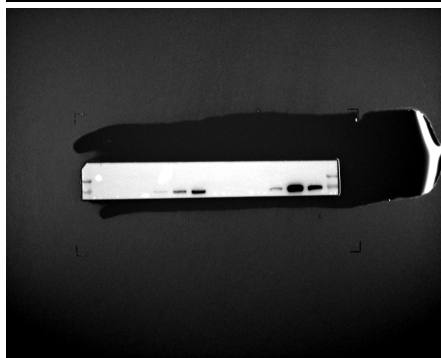

PD-L1 40-60KDa

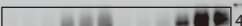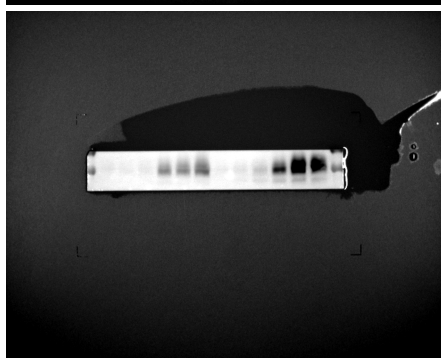

Fig.2b

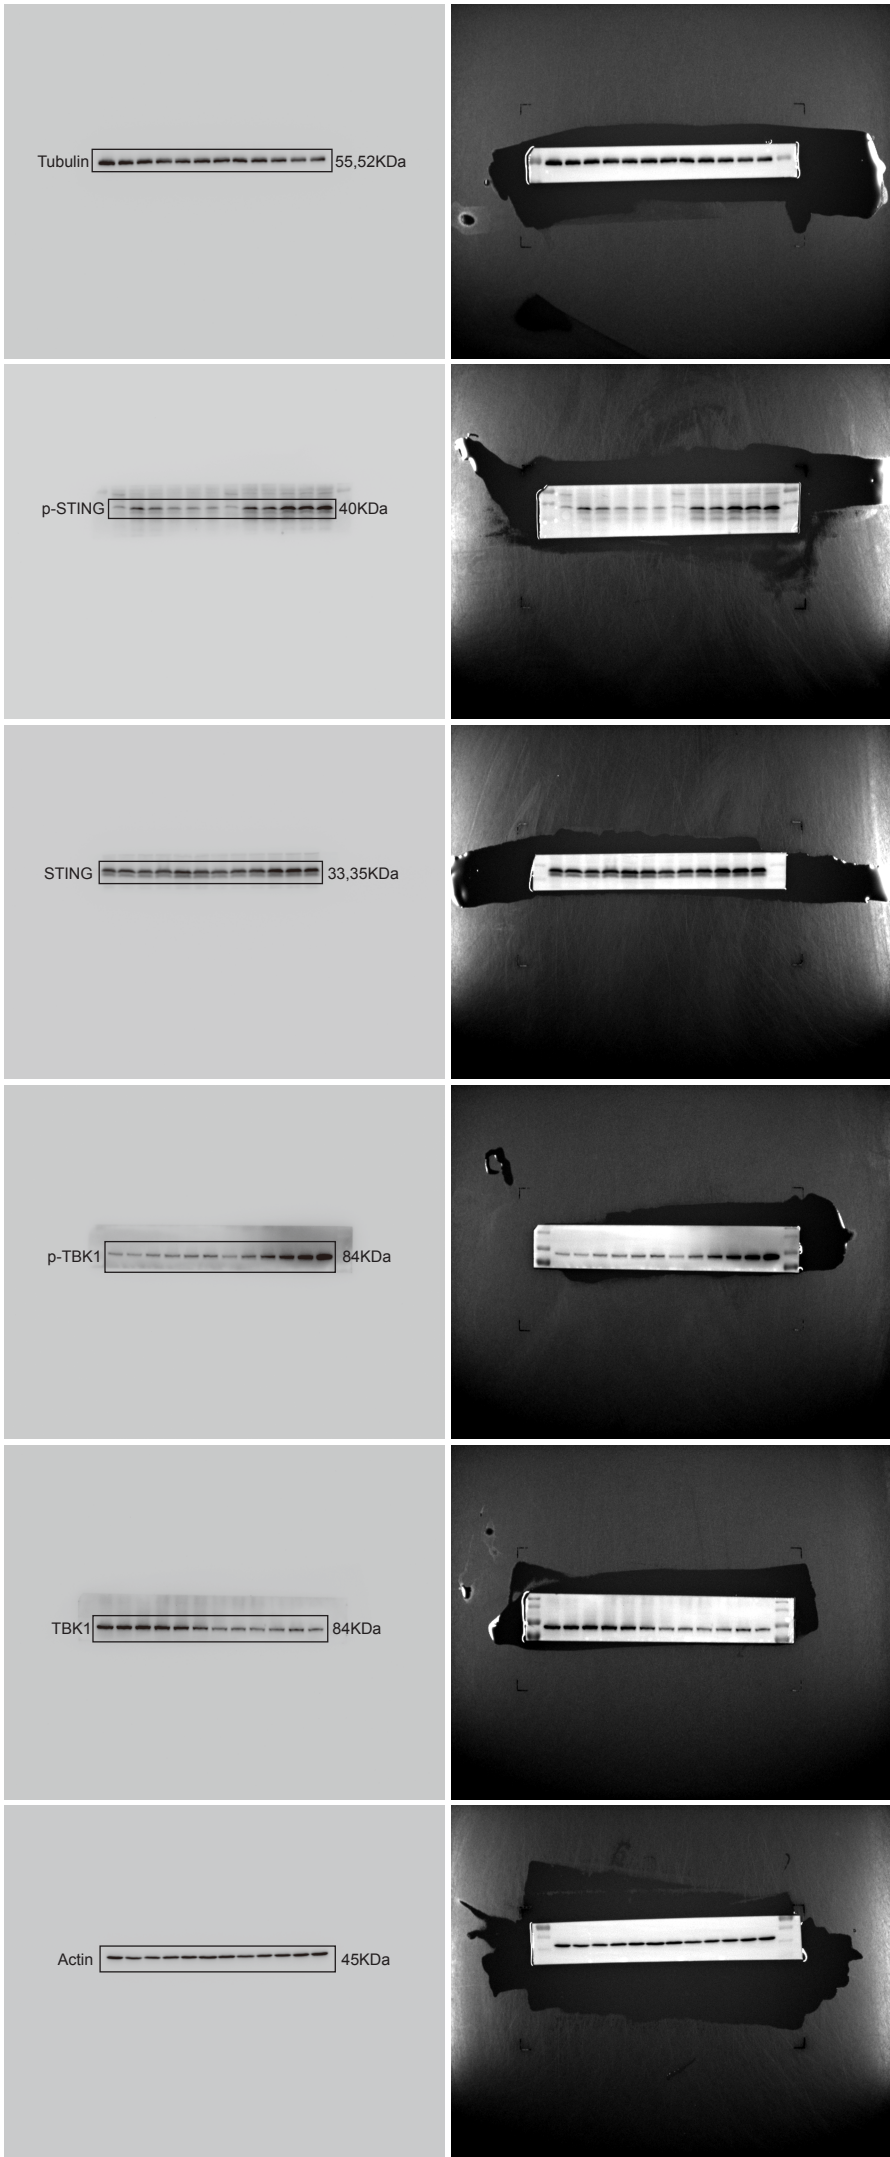

Fig2.c

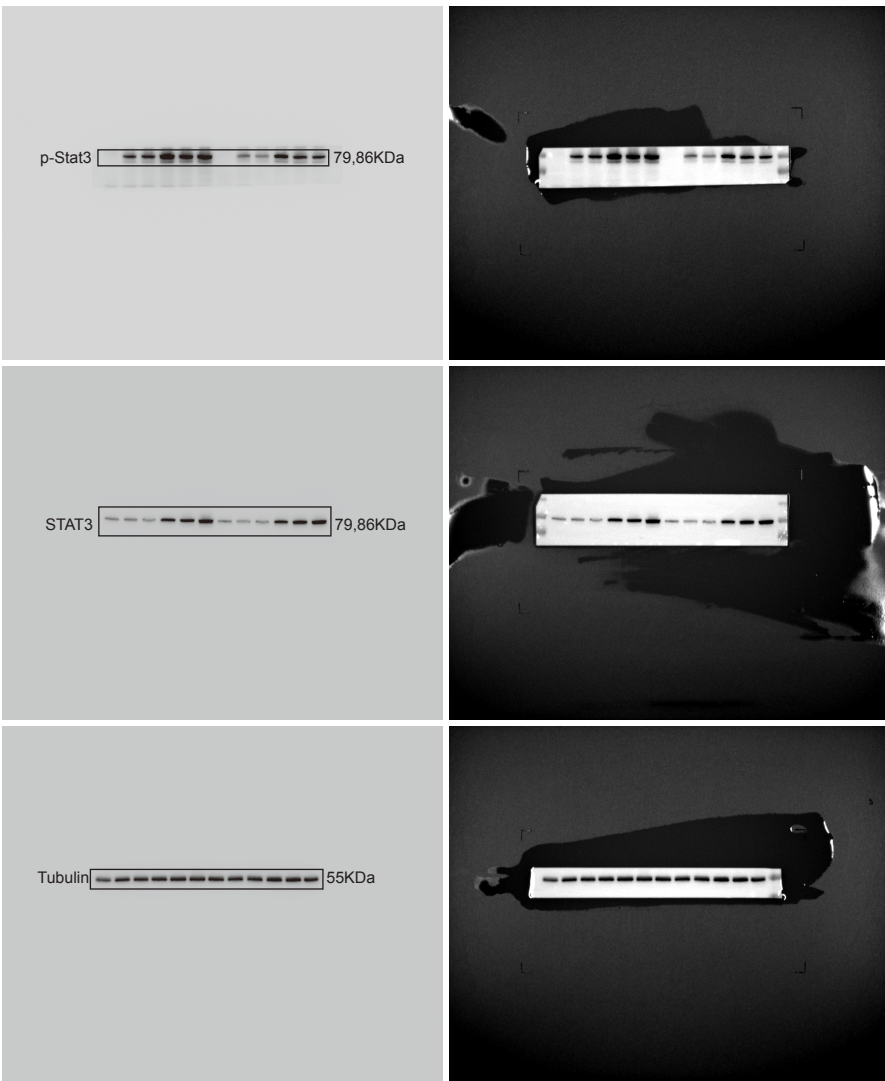

Fig2.d

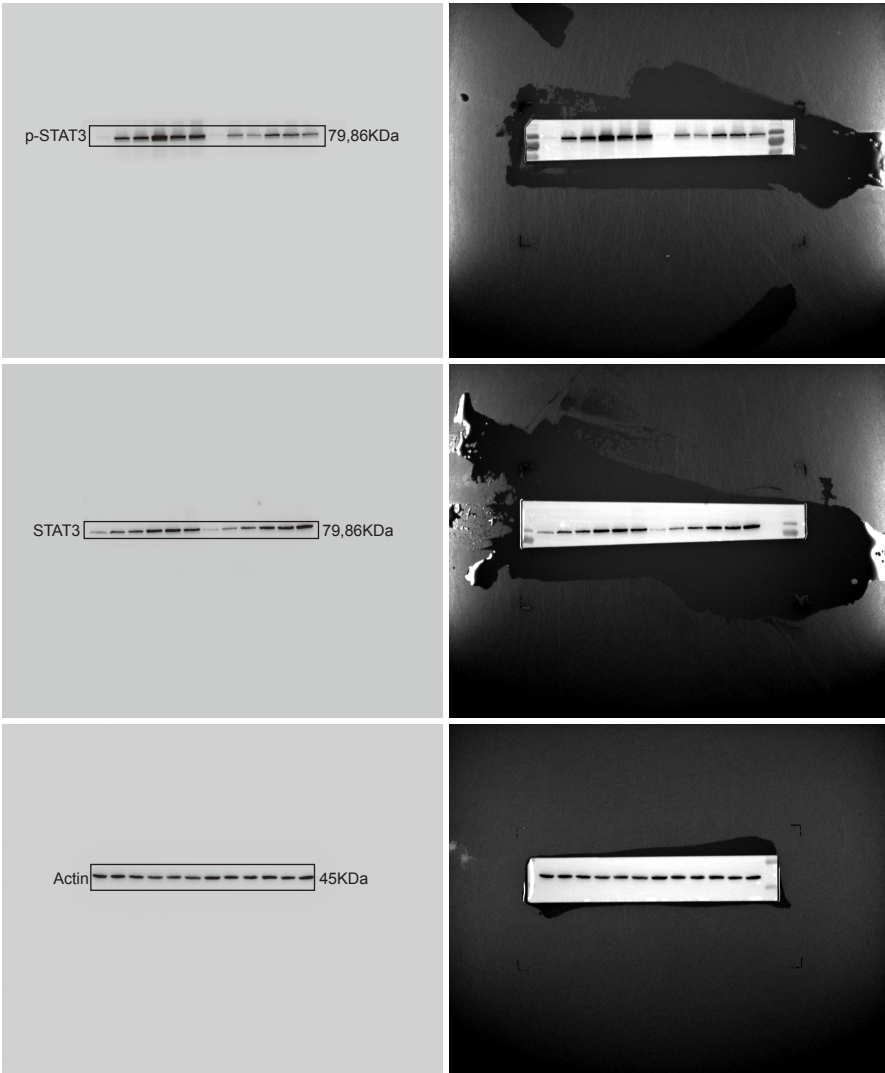



Fig3.a

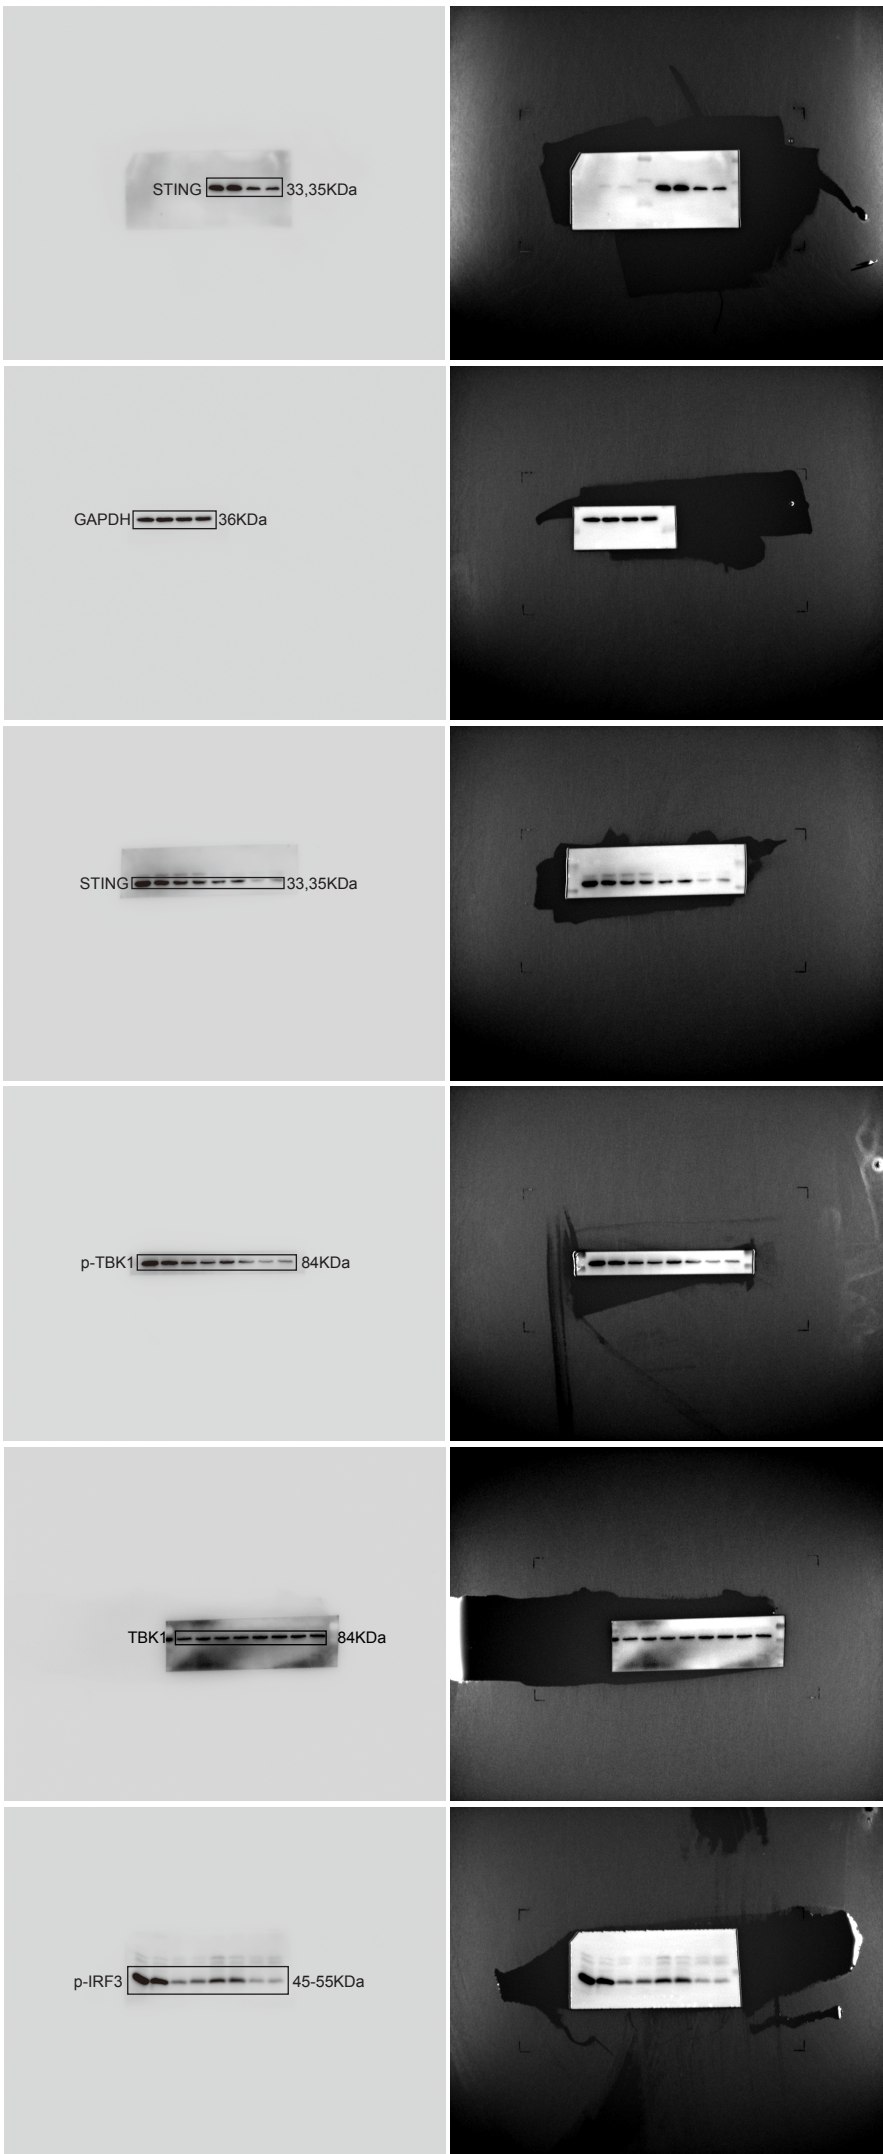

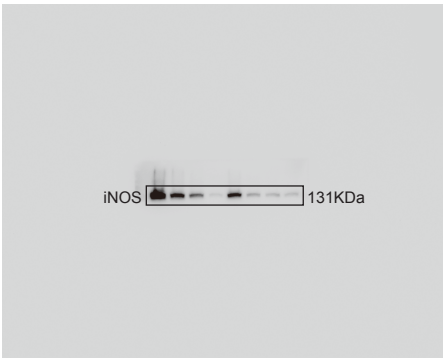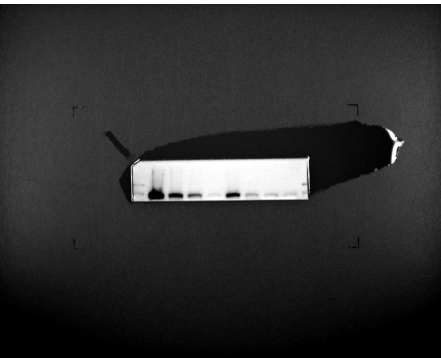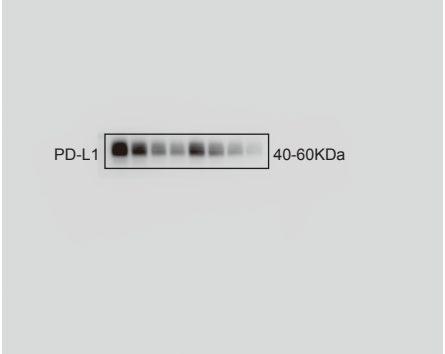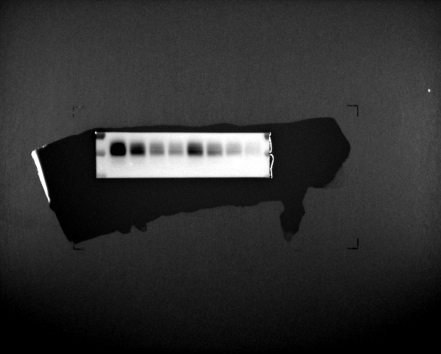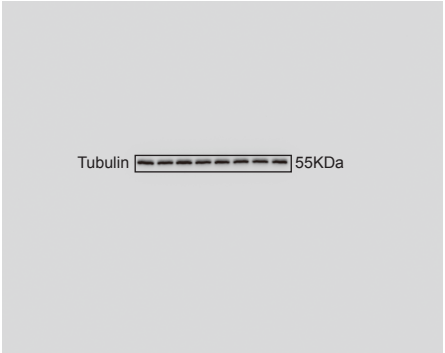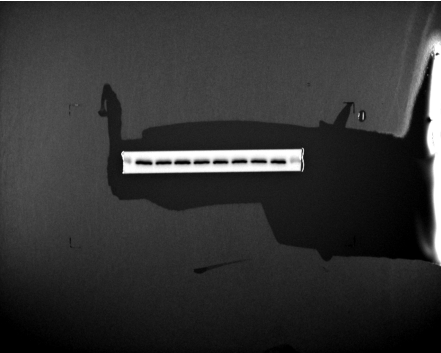

Fig3.b

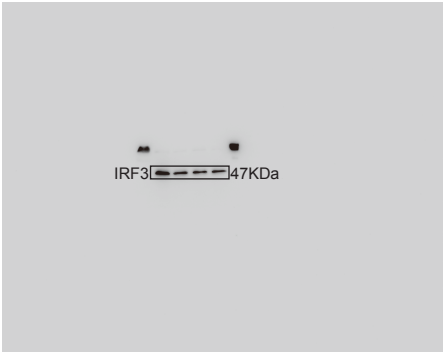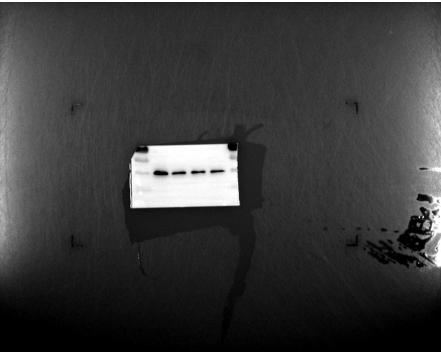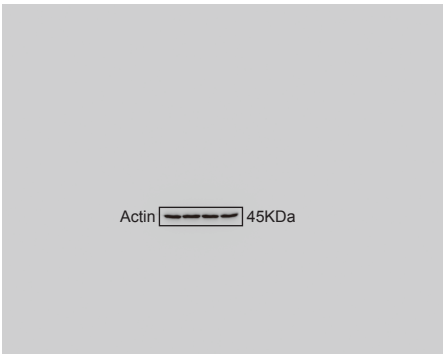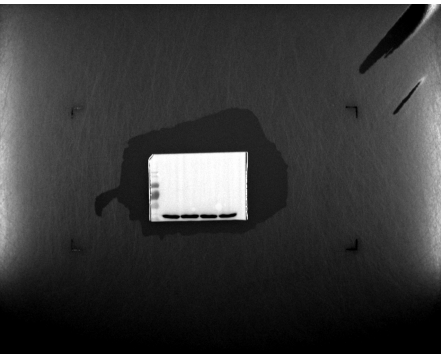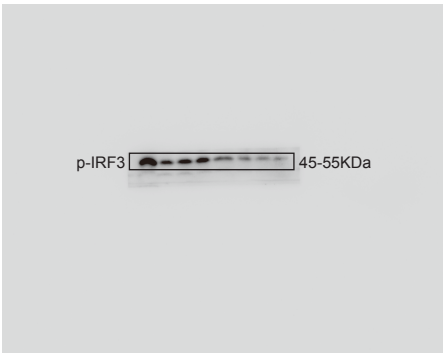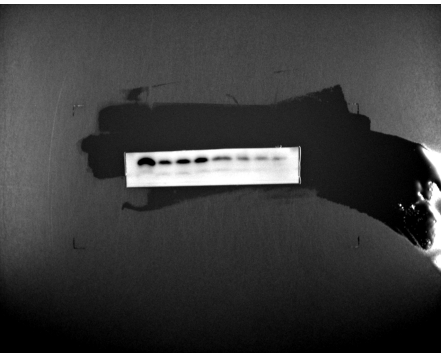

IRF3 47KDa

iNOS 131KDa

PD-L1 40-60KDa

Actin 45KDa

STING 33,35KDa

p-TBK1 84KDa

Fig3.c



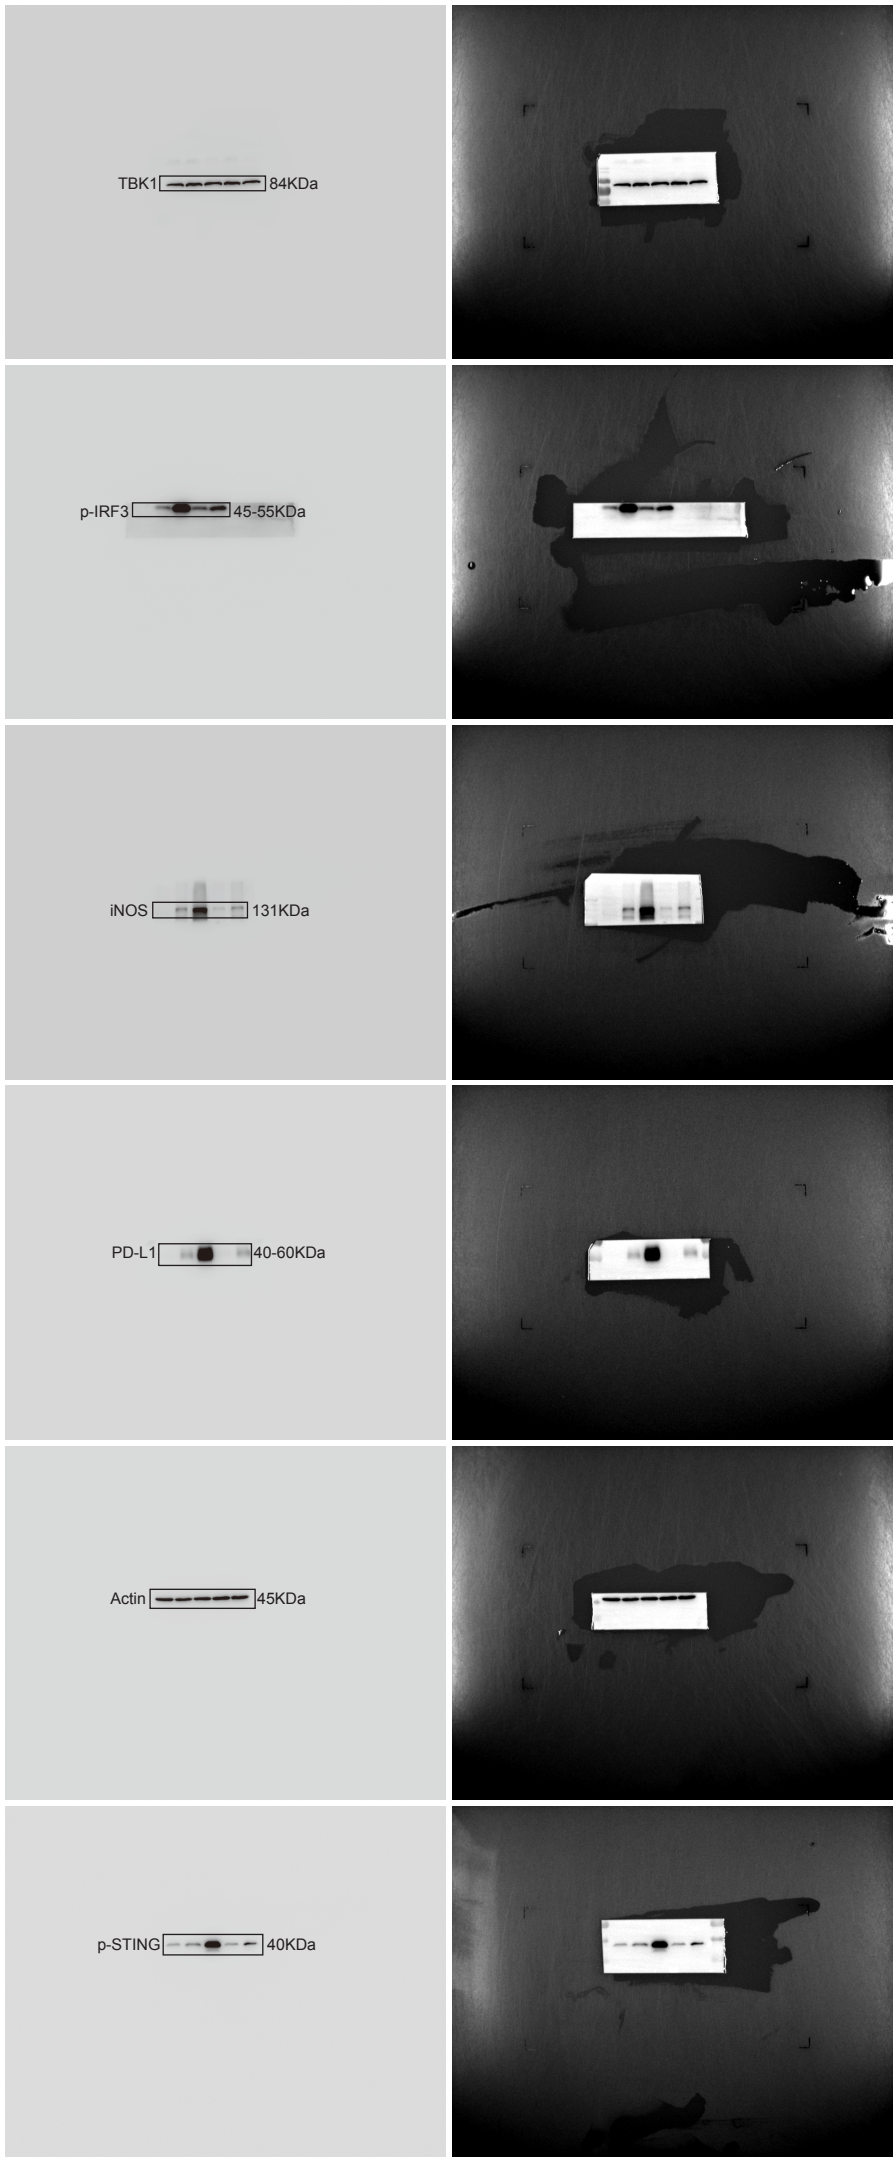

Fig3.d



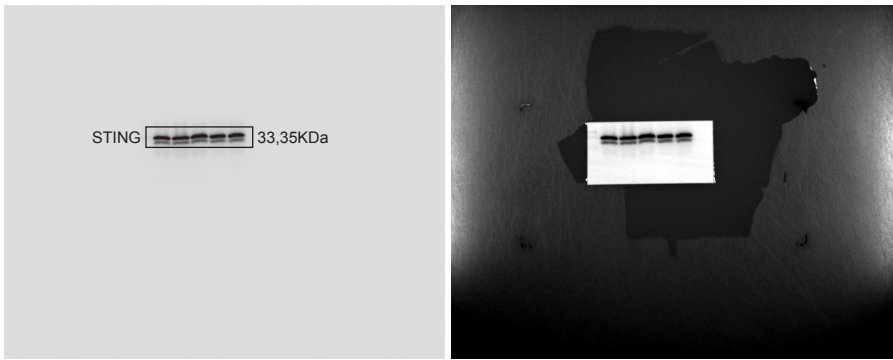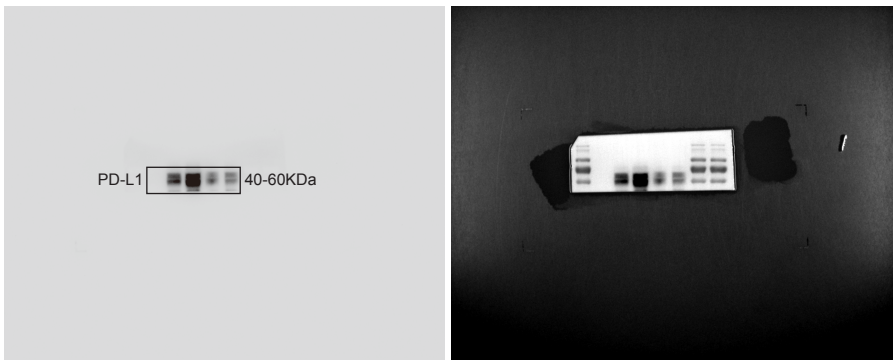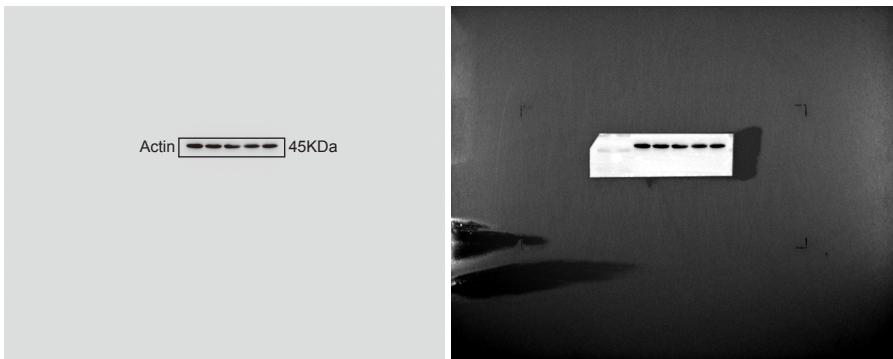

Fig3.e

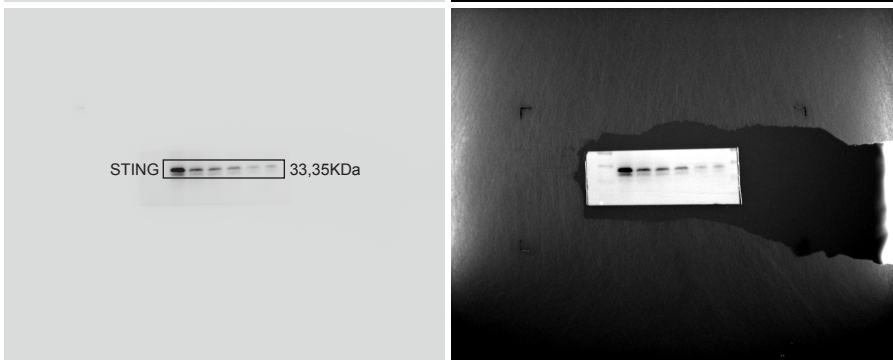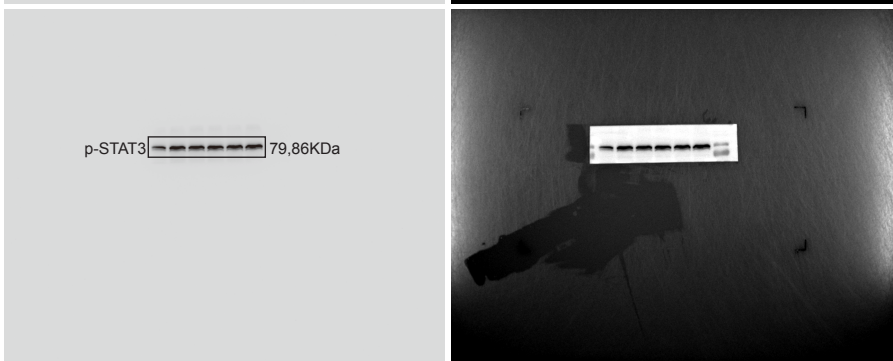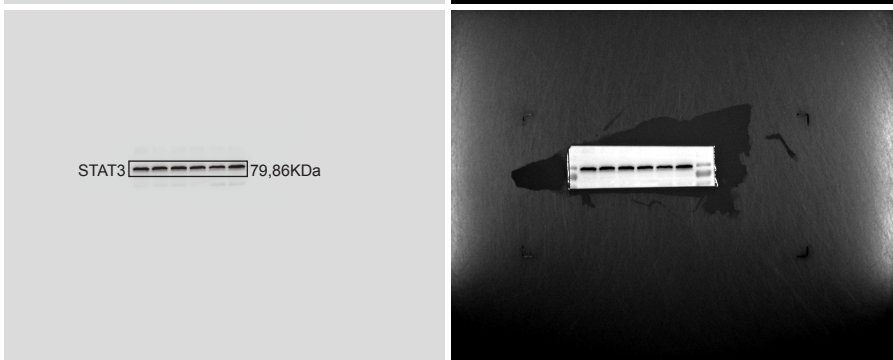

Fig3.f

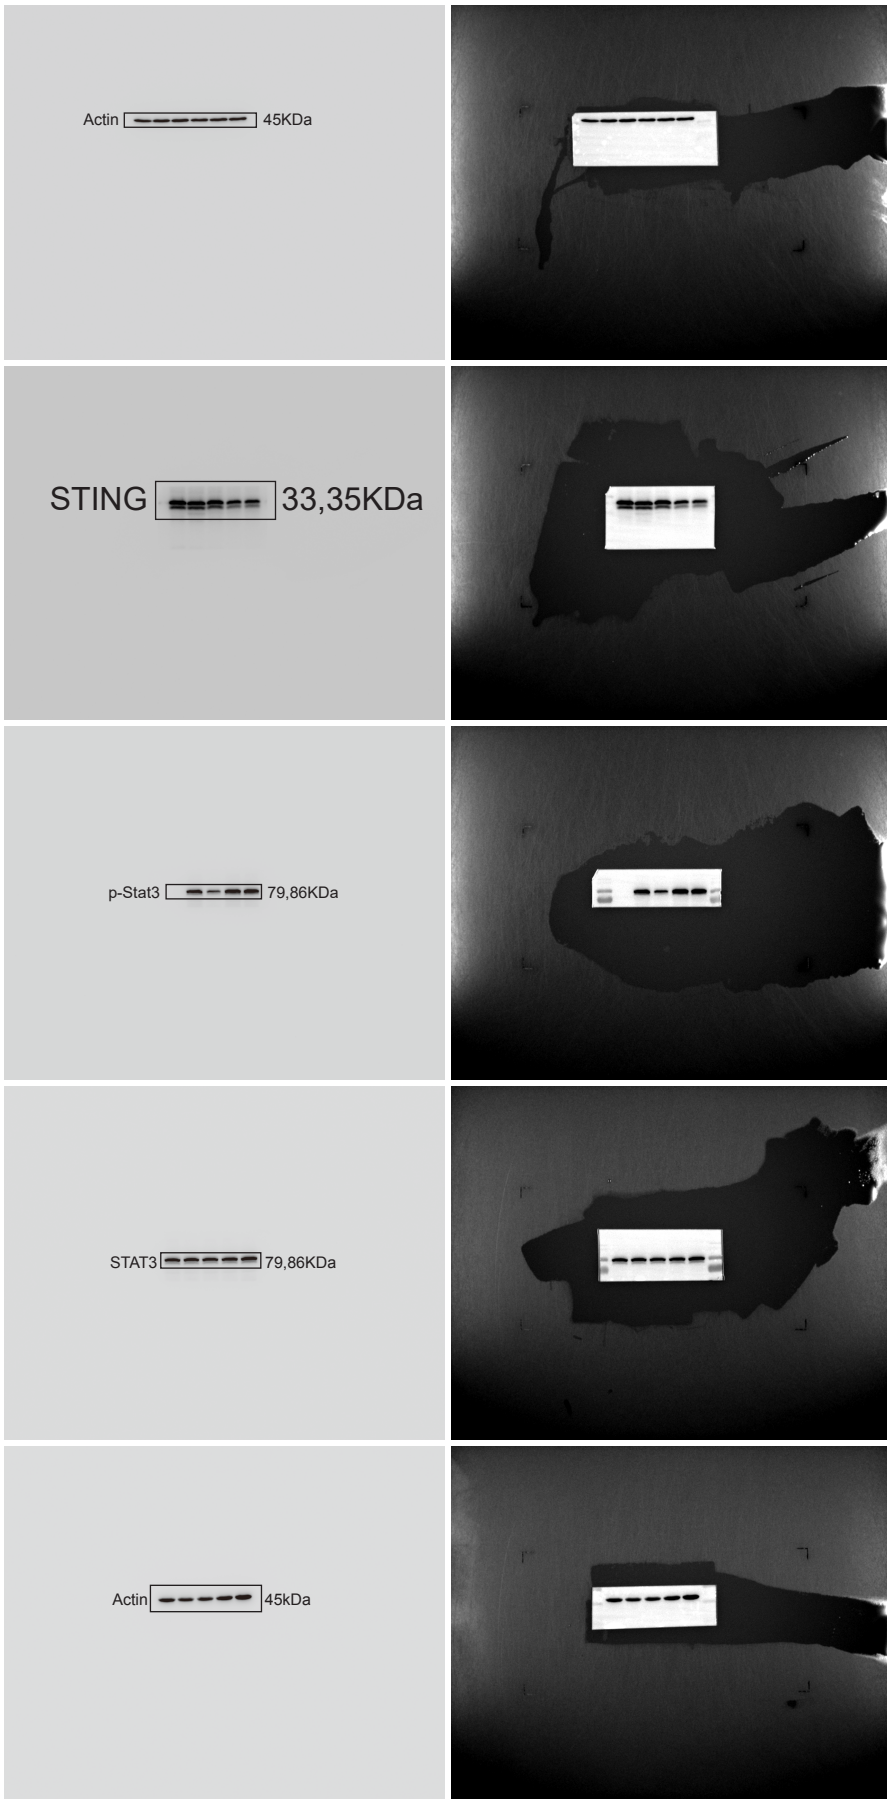

Fig3.g

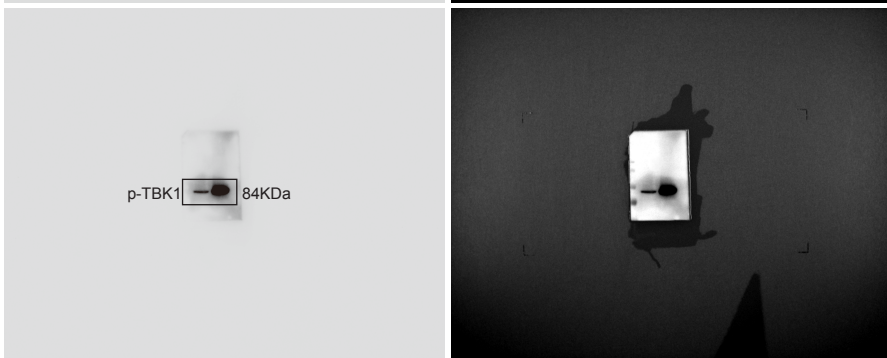

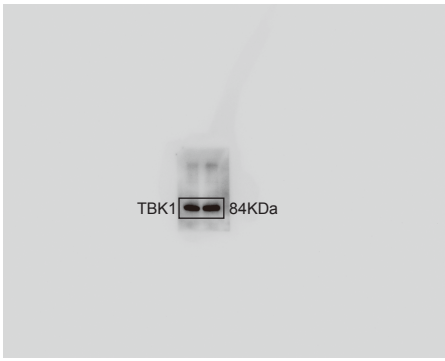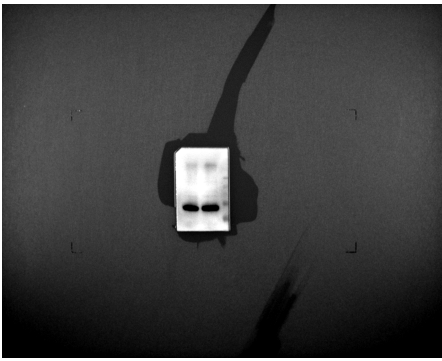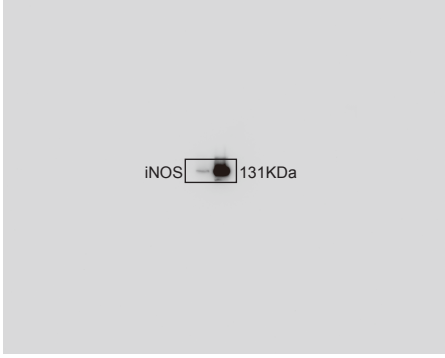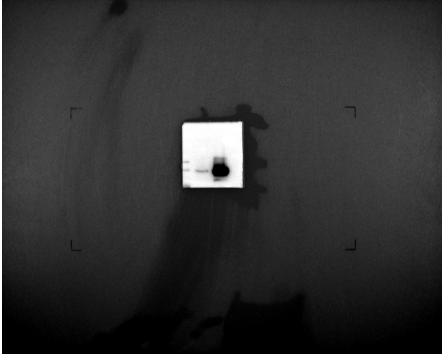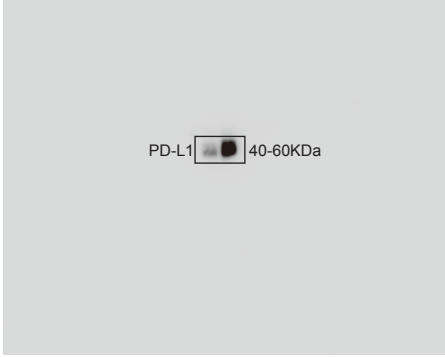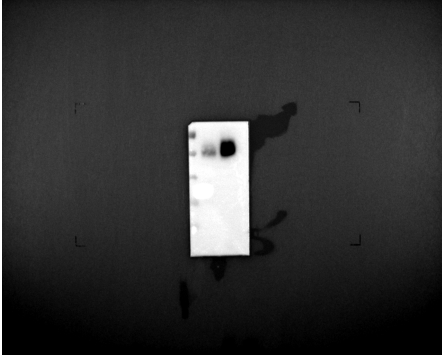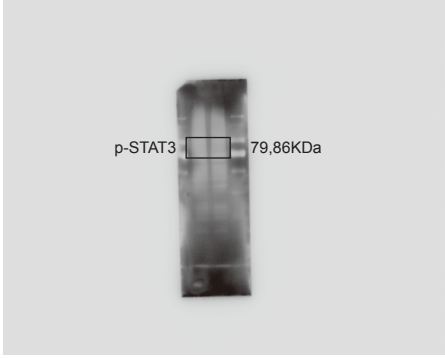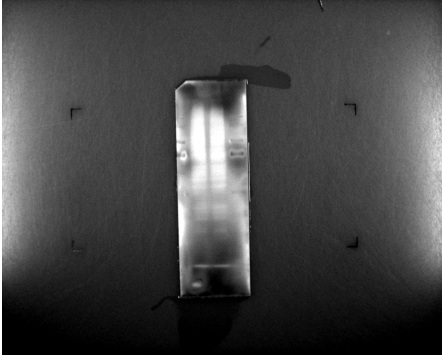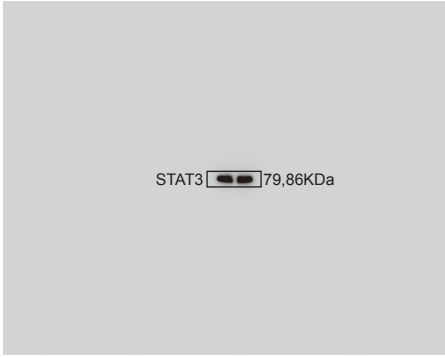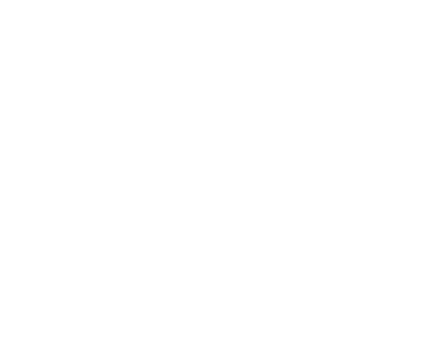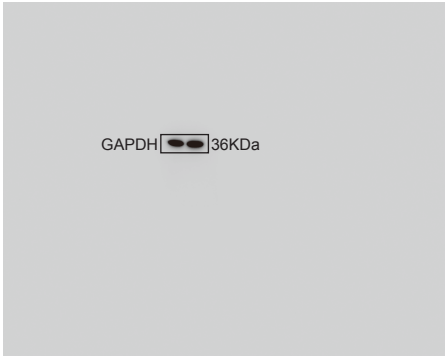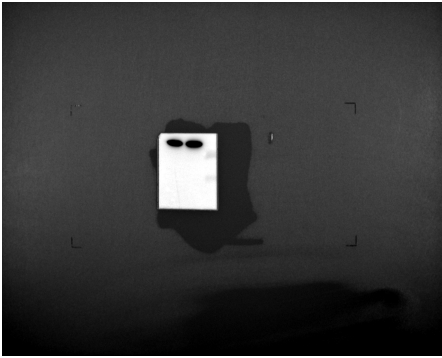

Fig3.h

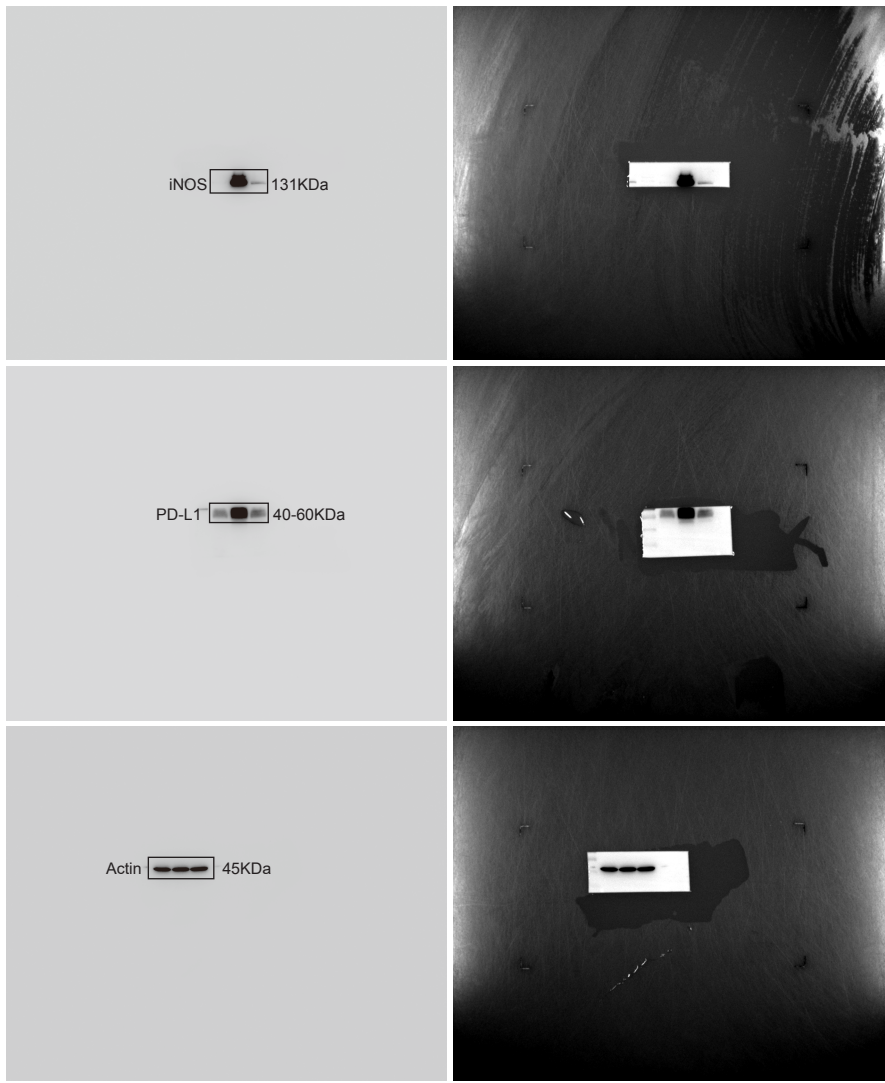

Fig3.i

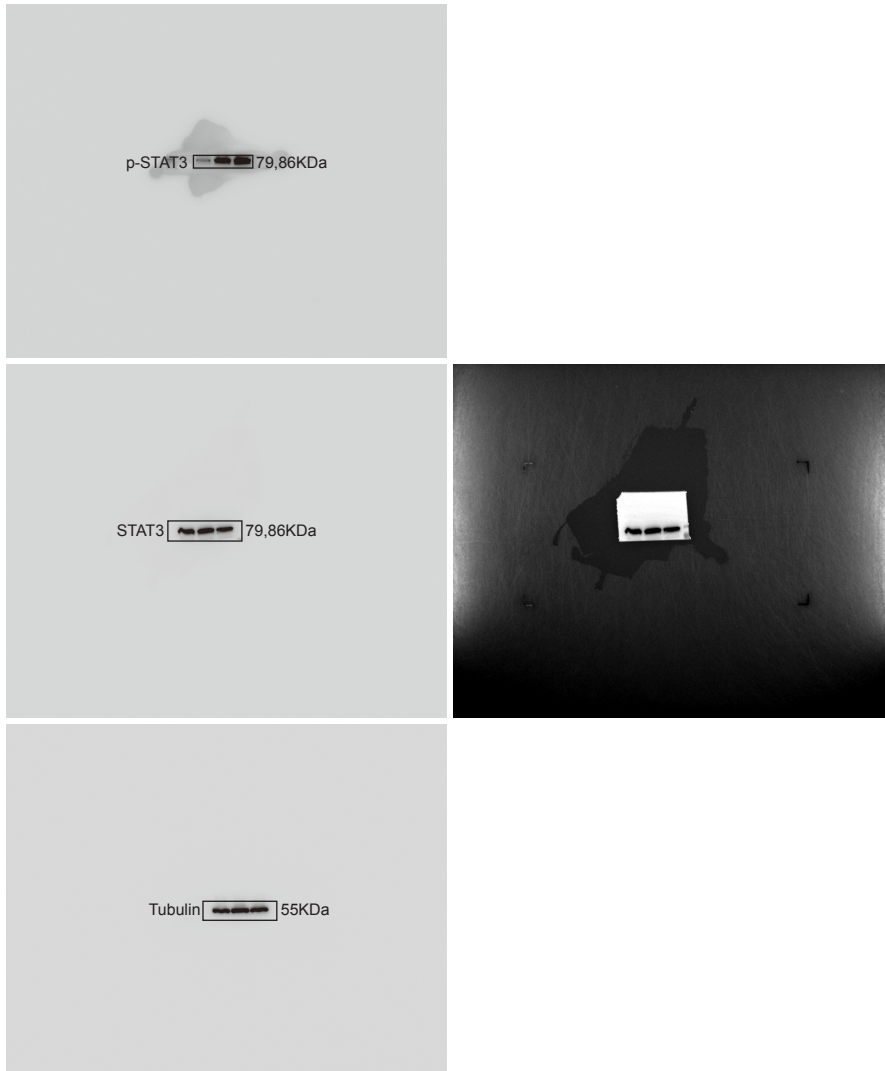



Fig7.c

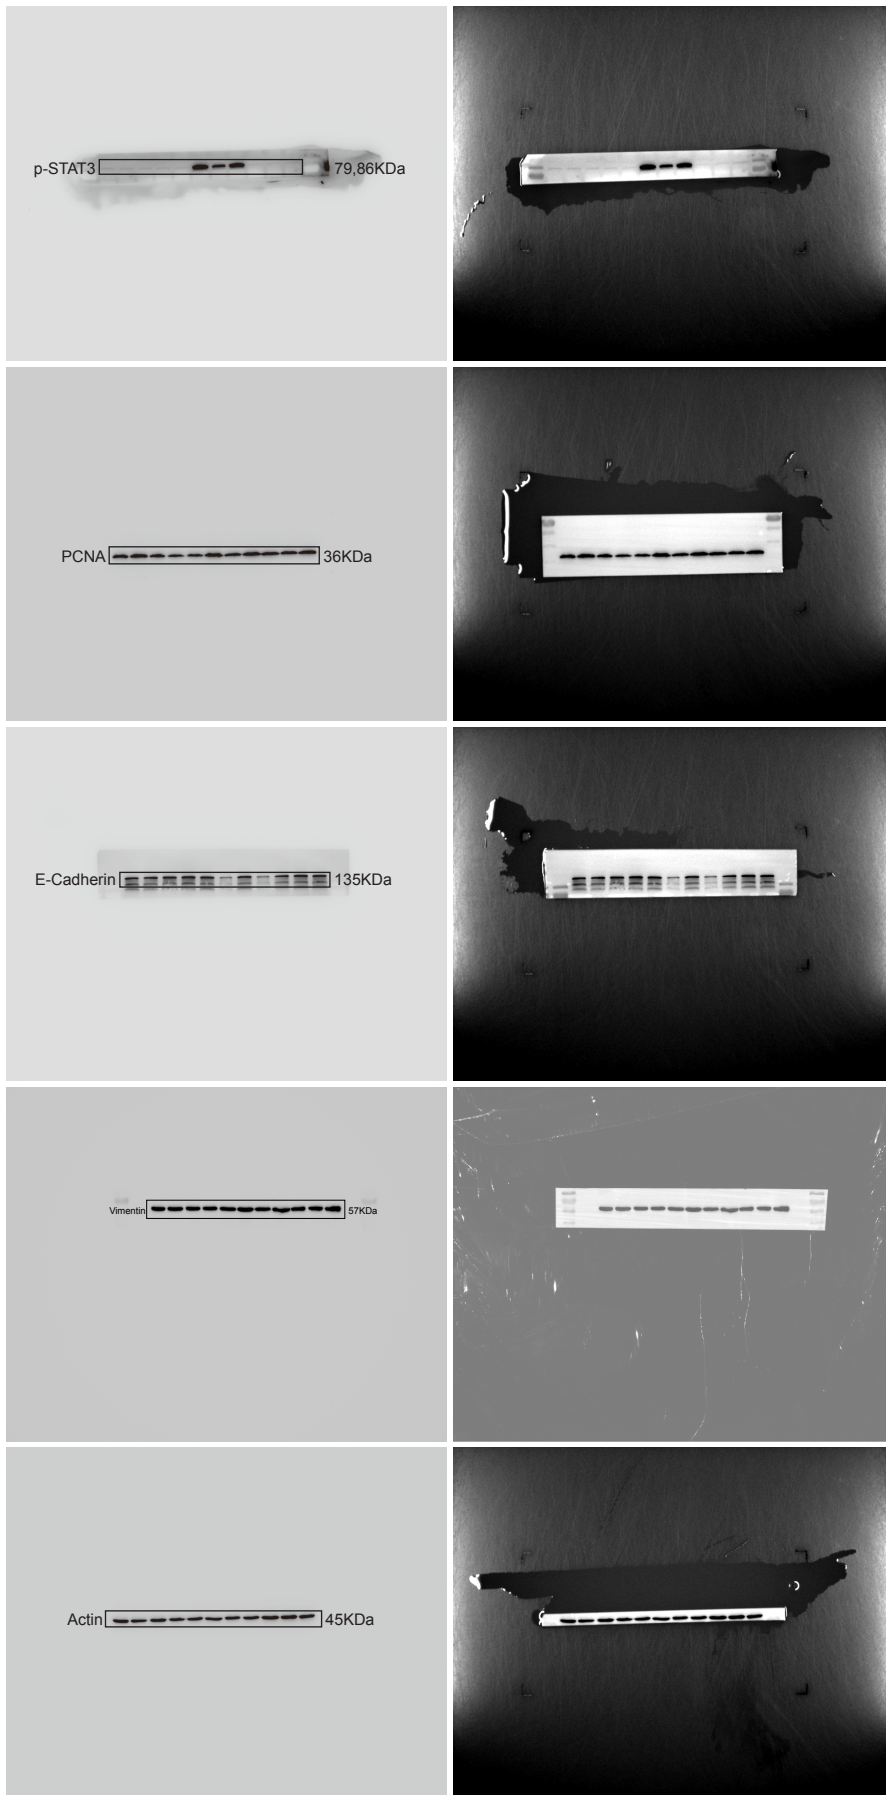

Fig7.d

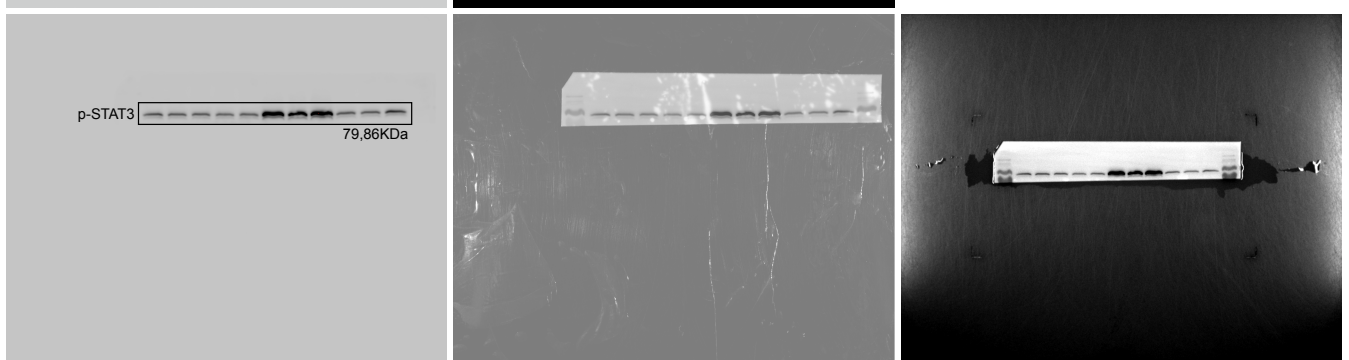

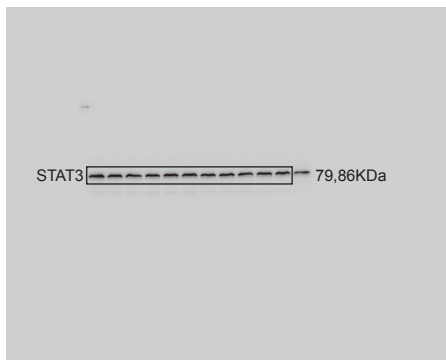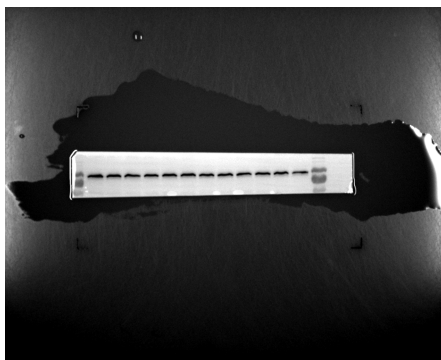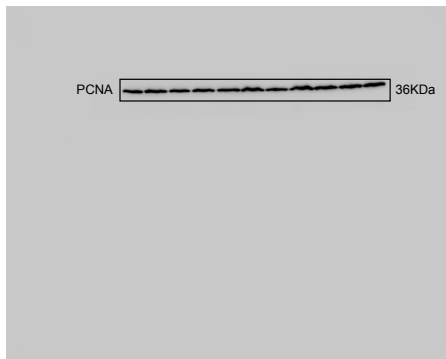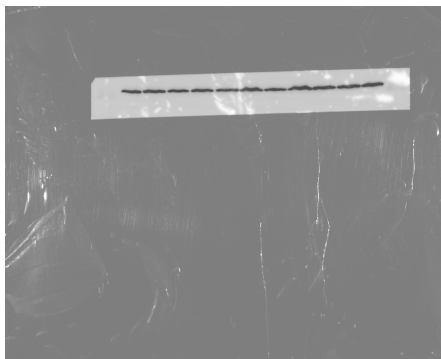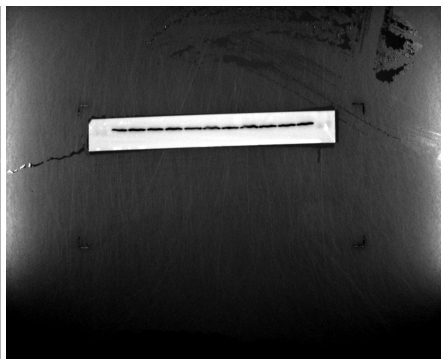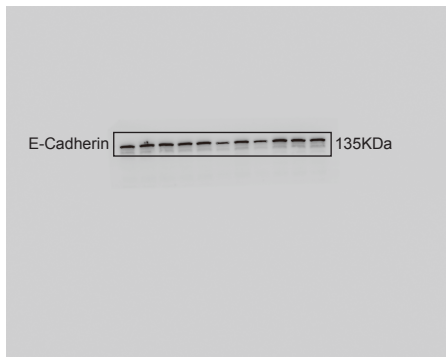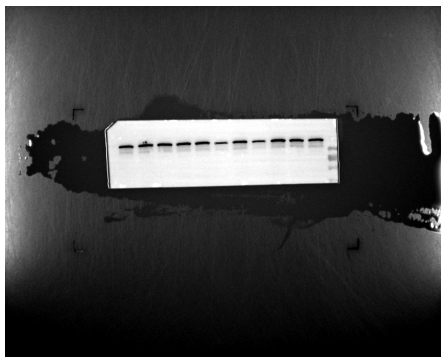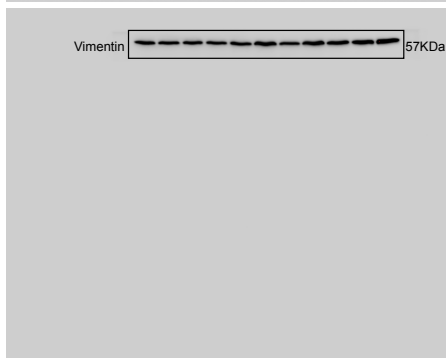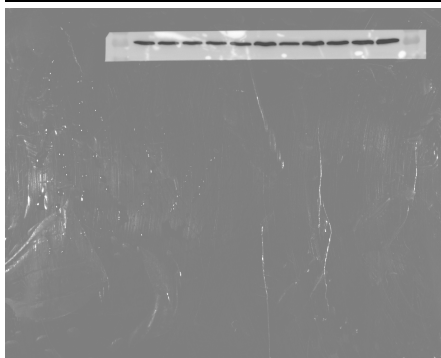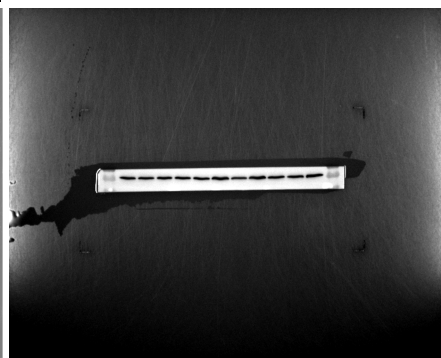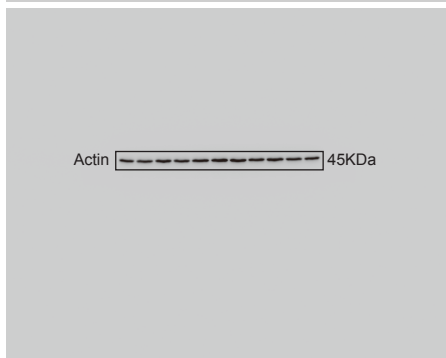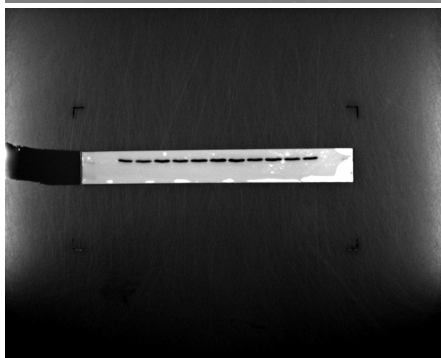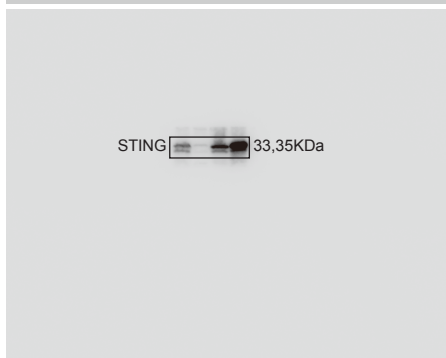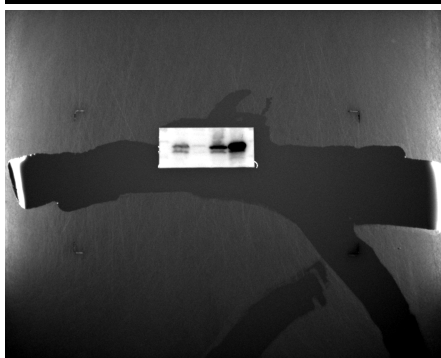

Fig7.e

STAT3 [Western blot image] 79,86KDa

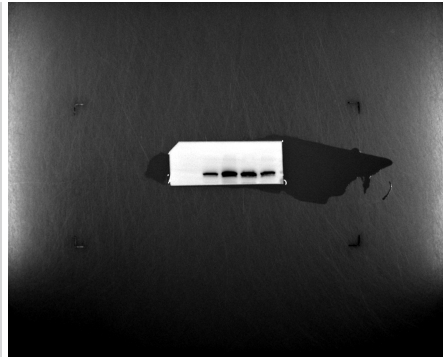

Actin [Western blot image] 45KDa

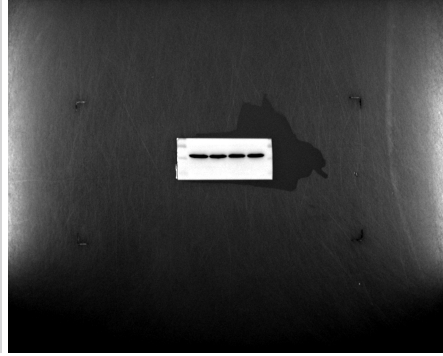

Supplement: 41598_2020_77800_MOESM1_ESM.pdf [file 41598_2020_77800_MOESM1_ESM.pdf]
